# Tau Protein Modulates an Epigenetic Mechanism of Cellular Senescence

1 **Claudia Magrin<sup>1,2</sup>, Martina Sola<sup>1,2</sup>, Ester Piovesana<sup>1,2</sup>, Marco Bolis<sup>3</sup>, Andrea Rinaldi<sup>4</sup>,**  
2 **Stéphanie Papin<sup>1,†</sup>, Paolo Paganetti<sup>1,2,†,\*</sup>**

3 <sup>1</sup>Laboratory for Aging Disorders, Laboratories for Translational Research, Ente Cantonale  
4 Ospedaliero, Bellinzona, Switzerland.

5 <sup>2</sup>PhD Program in Neurosciences, Faculty of Biomedical Sciences, Università della Svizzera Italiana,  
6 Lugano, Switzerland.

7 <sup>3</sup>Functional Cancer Genomics Laboratory, Institute of Oncology Research, Bellinzona, Switzerland.  
8 Bioinformatics Core Unit, Swiss Institute of Bioinformatics, Bellinzona, Switzerland. Università  
9 della Svizzera Italiana, Lugano, Switzerland. Laboratory of Molecular Biology, Istituto di Ricerche  
10 Farmacologiche Mario Negri IRCCS, Milano, Italy.

11 <sup>4</sup>Lymphoma and Genomics Research Program, Institute of Oncology Research, Bellinzona,  
12 Switzerland

13 <sup>†</sup>These authors share last authorship

## 14 \* Correspondence:

15 Prof. Paolo Paganetti, Laboratory for Aging Disorders, LRT EOC, Via Chiesa 5, 6500 Bellinzona,  
16 Switzerland. Phone +4158 666 7103.

17 [paolo.paganetti@eoc.ch](mailto:paolo.paganetti@eoc.ch)

18 **Keywords:** Tau, PRC2, transcription, IGFBP3, senescence, aging, disease

## 19 Abstract

20 Progressive Tau deposition in neurofibrillary tangles and neuropil threads is the hallmark of  
21 tauopathies, a disorder group that includes Alzheimer's disease. Since Tau is a microtubule-  
22 associated protein, a prevalent concept to explain the pathogenesis of tauopathies is that abnormal  
23 Tau modification contributes to dissociation from microtubules, assembly into multimeric  $\beta$ -sheets,  
24 proteotoxicity, neuronal dysfunction and cell loss. Tau also localizes in the cell nucleus and evidence  
25 supports an emerging function of Tau in DNA stability and epigenetic modulation. To better  
26 characterize the possible role of Tau in regulation of chromatin compaction and subsequent gene  
27 expression, we performed a bioinformatics analysis of transcriptome data obtained from Tau-  
28 depleted human neuroblastoma cells. Among the transcripts deregulated in a Tau-dependent manner,  
29 we found an enrichment of target genes for the polycomb repressive complex 2. We further describe  
30 decreased cellular amounts of the core components of the polycomb repressive complex 2 complex  
31 and a lower histone 3 trimethylation activity in Tau deficient cells. Among the de-repressed  
32 polycomb repressive complex 2 target gene products, IGFBP3 protein was found to be linked to  
33 increased senescence induction in Tau-deficient cells. Our findings propose a mechanism for Tau-  
34 dependent epigenetic modulation of cell senescence, a key event in pathologic aging.

## 35 1 Introduction

36 Tau pathology is the hallmark of tauopathies, a neurodegenerative disorder group that includes  
37 Alzheimer's disease (AD), where progressive Tau deposition in neurofibrillary tangles and neuropil  
38 threads correlates with a deteriorating clinical course (Long and Holtzman, 2019). Autosomal dominant  
39 mutations in the *MAPT* gene encoding for Tau lead to a relatively small group of frontotemporal lobar  
40 degenerations (FTLD-Tau), which are classified among frontotemporal dementia (Josephs, 2018)  
41 diagnosed mostly at 45-65 years of age (Hutton et al., 1998, Spillantini et al., 1998). With Tau being a  
42 microtubule-binding protein, a prevalent concept to explain the pathogenesis of tauopathies is that  
43 abnormal Tau modification e.g., phosphorylation and folding, contributes to Tau dissociation from  
44 microtubules, assembly into multimeric  $\beta$ -sheets, proteotoxicity, neuronal dysfunction and cell loss  
45 (Jeganathan et al., 2006, Ludolph et al., 2009). In addition to its well-characterized role in  
46 neurodegeneration, studies reporting a correlation between *MAPT* gene products and survival in  
47 various types of tumors endorse an implication of Tau in cancer (Papin and Paganetti, 2020, Gargini  
48 et al., 2020, Gargini et al., 2019, Cimini et al., 2022, Rossi et al., 2018). The mechanisms underlying  
49 these findings may involve microtubule-unrelated Tau functions.

50 Tau exerts non canonical functions e.g., it localizes in the cell nucleus and binds DNA (Cross et al.,  
51 1996, Greenwood and Johnson, 1995, Loomis et al., 1990, Thurston et al., 1996). Heat or oxidative  
52 stress cause nuclear translocation of Tau, which may favor its role in DNA protection (Sultan et al.,  
53 2011). Neurons knocked-out for *MAPT* display enhanced DNA damage (Violet et al., 2014), and  
54 induced DNA damage correlates with nuclear translocation and dephosphorylation of Tau (Ulrich et  
55 al., 2018). Chromosomal abnormalities in AD fibroblasts (Rossi et al., 2008) and frequent DNA  
56 damage in AD brains (Lovell and Markesbery, 2007, Mullaart et al., 1990), both reinforce the emerging  
57 function of Tau in DNA stability. Tau depletion also modulates the induction of apoptosis and cell  
58 senescence in response to DNA damage by a mechanism involving P53, the guardian of the genome  
59 (Sola et al., 2020). Additional functions of Tau in epigenetic modulation were also reported (Rico et  
60 al., 2021). Upon binding to histones, Tau stabilizes chromatin compaction (Montalbano et al., 2021,  
61 Frost et al., 2014, Rico et al., 2021, Montalbano et al., 2020) and affects global gene expression during  
62 the neurodegenerative process (Frost et al., 2014, Klein et al., 2019). A meta-analysis of dysregulated  
63 DNA methylation in AD identified over hundreds genomic sites in cortical regions (Shireby et al.,  
64 2022); growing to thousands when looking at the dentate gyrus of oldest old patients (Lang et al.,  
65 2022).

66 DNA and histone modification is an effective mechanism to regulate gene activity. Hence, with the  
67 aim to investigate a possible participation of Tau in gene expression, we performed a bioinformatics  
68 analysis of transcriptome data obtained from Tau-depleted human neuroblastoma cells. Among the  
69 transcripts deregulated in a Tau-dependent manner, we found an enrichment of target genes for the  
70 Polycomb Repressive Complex 2 (PRC2), a result confirmed by decreased PRC2 protein and histone  
71 3 (H3) methylation in Tau deficient cells. Notably, among the de-repressed gene products, Insulin  
72 Growth Factor Binding Protein 3 (IGFBP3) was linked to senescence induction. Our findings propose  
73 a Tau-driven mechanism for epigenetic modulation of cell senescence, a key event in pathologic aging.

## 74 2 Materials and methods

### 75 2.1 Cell culture

76 Human SH-SY5Y cells (94030304, Sigma-Aldrich) were cultured in complete Dulbecco's  
77 Modified Eagle Medium (61965-059, Gibco) supplemented with 1% non-essential amino acids  
78 (11140035, Gibco), 1% penicillin-streptomycin (15140122, Gibco) and 10% fetal bovine serum (FBS;

79 10270106, Gibco). Cells were grown at 37°C with saturated humidity and 5% CO<sub>2</sub> and maintained in  
80 culture for less than one month. *MAPT* knock-out cells were as described (Sola et al., 2020).

## 81 **2.2 RNAseq**

82 Total RNA extraction with the TRIzol™ Reagent (15596026, Invitrogen) was done according to  
83 the instructions of the manufacturer. Extracted RNA was processed with the NEBNext Ultra  
84 Directional II RNA library preparation kit for Illumina and sequenced on the Illumina NextSeq500  
85 with single-end, 75 base pair long reads. The overall quality of sequencing reads was evaluated using  
86 a variety of tools, namely FastQC (Wingett and Andrews, 2018), RSeQC (Wang et al., 2012), AfterQC  
87 (Chen et al., 2017) and Qualimap (García-Alcalde et al., 2012). Sequence alignments to the reference  
88 human genome (GRCh38) was performed using STAR (v.2.5.2a) (Dobin et al., 2013). Transcript  
89 expression was quantified at gene level with the comprehensive annotations v27 release of the Gene  
90 Transfer File (GTF) made available by Gencode (Harrow et al., 2012). Raw-counts were further  
91 processed in the R Statistical environment and downstream differential expression analysis was  
92 performed using the DESeq2 pipeline (Love et al., 2014). Transcripts characterized by low mean  
93 normalized counts were filtered out by the Independent Filtering feature embedded in DESeq2 (alpha  
94 = 0.05). The RNA-Seq data have the accession no. E-MTAB-8166 and were uploaded on  
95 [https://www.ebi.ac.uk/biostudies/arrayexpress/studies/E-MTAB-8166?key=64a67428-adb9-4681-](https://www.ebi.ac.uk/biostudies/arrayexpress/studies/E-MTAB-8166?key=64a67428-adb9-4681-99c9-98910b78ed4c)  
96 [99c9-98910b78ed4c](https://www.ebi.ac.uk/biostudies/arrayexpress/studies/E-MTAB-8166?key=64a67428-adb9-4681-99c9-98910b78ed4c). The genes differentially expressed between WT and Tau-KO cells (734) were  
97 used to interrogate a possible gene-set enrichment utilizing the transcription tool of the EnrichR portal  
98 (Chen et al., 2013, Kuleshov et al., 2016, Xie et al., 2021).

## 99 **2.3 Pseudoviral particle production and transduction**

100 Pseudolentiviral particles were produced by transient transfection of HEK293FT cells with 2 µg of  
101 the pSIF-H1-puro-IGFBP3 shRNA-2 or of the control plasmid pSIF-H1-puro-luciferase shRNA and 8  
102 µg of the feline immunodeficiency virus (FIV) packaging plasmid mix (pFIV-34N & pVSV-G); all  
103 plasmids were kindly provided by Prof. Yuzuru Shiio (Greehey Children's Cancer Research Institute,  
104 University of Texas). Cell conditioned medium was collected 2 days after transfection and cleared by  
105 centrifugation at 300 g for 5 min, 4°C. Pseudo-lentiviruses were 20-fold concentrated with centrifugal  
106 filters (MWCO 30 kDa, UFC903024, Amicon) at 3'000 g for 30-45 min, 4°C, aliquoted and stored at  
107 -80°C.

108 Human neuroblastoma SH-SY5Y cells (1 x10<sup>5</sup>) were seeded into a 24-well plate coated with poly-D-  
109 lysine (p6407, Sigma-Aldrich) one day before pseudo-lentiviral particle transduction. One day after  
110 transduction, cells were supplemented with fresh complete medium and selected in the presence of 2.5  
111 µg/mL puromycin (P8833, Sigma-Aldrich) for two weeks.

## 112 **2.4 Drugs and cell treatments**

113 Treatment of SH-SY5Y cells with Tazemetostat (CAS No. 1403254-99-8, S7128, Selleckchem)  
114 was performed at 10 µM for four days starting from a 10 mM stock solution in DMSO; vehicle 0.1%  
115 DMSO was added to the controls.

## 116 **2.5 Western blot and immune precipitation**

117 For direct analysis by western blot, total lysates from cells cultured in 6-well plates were prepared  
118 in 50 µL of SDS-PAGE sample buffer (1.5% SDS, 8.3% glycerol, 0.005% bromophenol blue, 1.6% β-  
119 mercaptoethanol and 62.5 mM Tris pH 6.8) and incubated for 10 min at 100°C. 15 µL per lane of the  
120 sample was loaded on SDS-polyacrylamide gels (SDS-PAGE).

121 For immune isolation, the cells were rinsed with PBS and lysed on ice in 100  $\mu$ L of AlphaLisa Lysis  
122 Buffer (AL003, PerkinElmer) supplemented with protease and phosphatase inhibitor cocktails (S8820  
123 & 04906845001, Sigma-Aldrich). Cell lysates were treated with benzonase (707463, Novagen) for 15  
124 min at 37°C, centrifuged at 20'000 g for 10 min at 4°C and supernatants were collected as cell extracts.  
125 These latter were diluted in HiBlock buffer (10205589, PerkinElmer) and incubated overnight at 4°C  
126 with 0.5  $\mu$ g of primary antibodies against SUZ12 (3737, Cell Signaling Technology), or EZH2 (5246,  
127 Cell Signaling Technology). Protein G-Sepharose beads (101241, Invitrogen) were added for 1 h at  
128 room temperature (RT) and the beads were washed three times in PBS with 0.1% Tween-20. Bead-  
129 bound proteins were eluted in SDS-PAGE sample buffer by boiling for 10 min at 100°C.

130 After SDS-PAGE, PVDF membranes with transferred proteins were incubated with primary  
131 antibodies: 0.084  $\mu$ g/mL SUZ12, 0.421  $\mu$ g/mL EZH2, 0.18  $\mu$ g/mL GAPDH (ab181602, Abcam), 0.1  
132  $\mu$ g/mL H3K27me3 (C15410069, Diagenode), 0.02  $\mu$ g/mL H3 (ab176842, Abcam), or 0.4  $\mu$ g/mL  
133 IGFBP3 (sc365936, Santa Cruz Biotechnology). Primary antibodies were revealed with anti-mouse  
134 IgG coupled to IRDye RD 680 or anti-rabbit IgG coupled to IRDye 800CW (Licor Biosciences, 926–  
135 68070 & 926–32211) on a dual infrared imaging scanner (Licor Biosciences, Odyssey CLx 9140) and  
136 quantified with the software provided (Licor Biosciences, Image Studio V5.0.21, 9140–500).

## 137 **2.6 Immune staining**

138 For immune staining, cells were grown on poly-D-lysine coated 8-well microscope slides (80826-  
139 IBI, Ibbidi). Cells were fixed in 4% paraformaldehyde and stained (Ulrich et al., 2018) with primary  
140 antibodies: 0.168  $\mu$ g/mL SUZ12, 0.842  $\mu$ g/mL EZH2, 1.6  $\mu$ g/mL H3K27me3 or 1.5  $\mu$ g/mL p16  
141 (ab108349, Abcam). Detection by fluorescent laser confocal microscopy (Nikon C2 microscope) was  
142 done with 2  $\mu$ g/mL secondary antibodies anti-mouse IgG Alexa594, anti-rabbit IgG -Alexa 488 or anti-  
143 rabbit IgG-Alexa 647 (A-11032, A-11034, A21245, Thermo Fisher Scientific). Nuclei were  
144 counterstained with 0.5  $\mu$ g/mL DAPI (D9542, Sigma-Aldrich). Images were acquired by sequential  
145 excitations (line-by-line scan) with the 405 nm laser (464/40 emission filter), the 488 nm laser  
146 (525/50 nm filter), the 561 nm laser (561/LP nm filter) and the 650 nm laser (594/633 emission filter).  
147 ImageJ was used for all image quantifications.

## 148 **2.7 RNA extraction and RT-qPCR**

149 Total RNA extraction using the TRIzol™ Reagent (15596026, Invitrogen) and cDNA synthesis  
150 using the GoScript Reverse Transcription Mix Random Primers (A2800, Promega) were done  
151 according to the instructions of the manufacturer. Amplification was performed with SsoAdvanced  
152 Universal SYBR Green Supermix (1725271, BioRad) with 43 cycles at 95°C for 5 sec, 60°C for 30  
153 sec and 60°C for 1 min using specific primers for *EZH2*, *SUZ12*, *IGFBP3*, *GPR37*, *ITGA3*, *MRC2* and  
154 *IRF6* gene transcripts (**Supplementary Table IV**). Relative RNA expression was calculated using the  
155 comparative Ct method and normalized to the geometric mean of the GAPDH and HPRT1 mRNAs.

## 156 **2.8 SA- $\beta$ Gal assay**

157 Senescence-associated  $\beta$ -galactosidase (SA- $\beta$ Gal) staining was determined on cells grown in 6-well  
158 plates, fixed with 2% paraformaldehyde for 10 min at RT and washed twice with gentle shaking for 5  
159 min at RT. Cells were then incubated with 1 mg/mL X-gal (20 mg/mL stock in DMF; B4252, Sigma-  
160 Aldrich,) diluted in pre-warmed 5 mM  $K_3[Fe(CN)_6]$  (P-8131, Sigma-Aldrich), 5 mM  
161  $K_4[Fe(CN)_6] \cdot 3H_2O$  (P-3289, Sigma-Aldrich), and 2 mM  $MgCl_2$  (M-8266, Sigma-Aldrich) in PBS at  
162 pH 6.0. Acquisition and quantification of the images for SA- $\beta$ Gal activity and cell area were done with  
163 an automated live cell imager (Lionheart FX, BioTek).

## 164 2.9 LysoTracker

165 For LysoTracker staining, cells were seeded in poly-D-lysine coated 8-well microscope slides,  
166 incubated for 10 min at 37°C with 0.25 µM LysoTracker Red (L7528, Thermo Fischer Scientific).  
167 Nuclei were counterstained with 2.5 µg/mL Hoechst (H3570, Invitrogen) for 10 min at 37°C,  
168 afterwards cells were washed with complete medium. Images of living cells were acquired on a  
169 fluorescent laser confocal microscope (C2, Nikon) by sequential excitations (line-by-line scan) with  
170 the 405 nm laser (464/40 nm emission filter), and the 561 nm laser (561/LP nm filter). ImageJ was used  
171 for all image quantifications. Both the lysosomes area and the mean number of lysosomes per cells and  
172 per images were determined.

## 173 3 Results

### 174 3.1 Transcriptomics analysis of Tau-KO cells

175 We performed a next-generation transcription (RNAseq) analysis of human SH-SY5Y  
176 neuroblastoma cells knocked-out for Tau when compared to normal Tau-expressing cells (**Fig 1A**).  
177 The sequences obtained from the six samples analyzed (three Tau expressing cell lines, three Tau-KO  
178 cell lines) mapped reliably to ~16'000 genes. Additional 14'000 transcripts were expressed at low  
179 levels and were not included in the differential expression analysis. The primary data were stored at  
180 <https://www.ebi.ac.uk/biostudies/> with open access (E-MTAB-8166). When filtering for differentially  
181 expressed transcripts in Tau-KO cells, 1388 RNAs displayed a significant change (Adj P <.05), of  
182 which 723 RNAs were up-regulated in the log<sub>2</sub>(FC) range between 0.31 and 11.05 (between 1.24 and  
183 ~2000 fold higher than in control Tau expressing cells) (**Supplementary Table I**).

184 We selected these 723 differentially expressed genes to interrogate a possible gene-set enrichment  
185 utilizing the transcription tool of the EnrichR portal (Chen et al., 2013, Kuleshov et al., 2016, Xie et  
186 al., 2021). The CHIP-sequencing datasets (ChEA 2016) identified an overrepresentation of Polycomb  
187 Repressive Complex-associated proteins among the 68 datasets showing a significant (Adj P <.01)  
188 difference. Indeed, almost half of the enriched CHIP-sequencing datasets were obtained from core  
189 components or known regulators of PRC2 (32%) or of PRC1 (16%) (**Fig 1B; Supplementary Table**  
190 **II**). PRC2 actively catalyzes the trimethylation of histone 3 (H3) at lysin 27 (H3K27me3) (Laugesen  
191 et al., 2016, Moritz and Trievel, 2018). In agreement with the identification of PRC2 in the CHIP-  
192 sequencing datasets, mining of the epigenomics roadmap (HM CHIP-seq) resulted in a 73% enrichment  
193 of the H3K27me3 signature (Adj P <.01) in 45 datasets (**Fig 1C; Supplementary Table III**).  
194 Altogether, analysis of the RNAseq data suggested that up-regulation of transcription of a specific set  
195 of genes in Tau-depleted neuroblastoma SH-SY5Y cells might ensue from a relief of gene activity  
196 decline controlled by PRC2.

### 197 3.2 Reduced expression and activity of PRC2 in Tau-depleted cell

198 We subsequently analyzed the amount of two PRC2 core components in Tau-KO cells by western  
199 blot. In agreement with what suggested by the transcriptomics data, we observed reduced amounts of  
200 the catalytic subunit EZH2 and the scaffold subunit SUZ12 of PRC2 in Tau-KO cells when compared  
201 to Tau-expressing cells (**Fig 2A**). Reduced proteins were found also by quantitative immune staining  
202 of the cells utilizing specific antibodies (**Fig 2B**). RT-qPCR analysis excluded that the effect on PRC2  
203 protein resulted from reduced transcription since no difference was found for the EZH2 and SUZ12  
204 mRNAs (**Fig 2C**), data that suggested a Tau-dependent effect on PRC2 protein stability. Nonetheless,  
205 co-immune isolation revealed the presence of the EZH2-SUZ2 core complex of PRC2 in Tau-KO cells,  
206 albeit at reduced levels when compared to controls (**Fig 2D**).

207 PRC2 enzymatic activity was determined by western blot and quantitative immune staining of  
208 H3K27me3, an epigenetic mark produced by the histone methyl transferase activity of PRC2 (Guo et  
209 al., 2021). Confirming the lower amounts of the PRC2 complex, we found that Tau-KO cells display  
210 reduced H3K27me3 (**Fig 3A-B**). Among the upregulated transcripts found by RNA-seq in Tau-KO  
211 cells, we selected five known PRC2 targets displaying close to average signals (**Supplementary Table**  
212 **I**): *IGFBP3* (19.0x of WT, adjP .004), *GPR37* (9.3x, .015), *ITGA3* (6.3x, .017.3x), *MRC2* (5.1x, .016),  
213 and *IRF6* (3.2x, .0498). Determination of mRNA expression by RT-qPCR validated their up-regulation  
214 (**Fig 3C**); indicating again that Tau-depletion relieved repression of transcription caused by reduced  
215 PRC2 activity in Tau-depleted cells.

216

### 217 **3.3 PRC2-dependent overproduction of IGFBP3 in Tau-KO cells**

218 IGFBP3 protein is a component of the senescence-associated secreted phenotype (SASP) (Basisty  
219 et al., 2020). Having previously reported that Tau-depletion favored cellular senescence (Sola et al.,  
220 2020), we interrogated the role of IGFBP3 in this process. As anticipated from the mRNA data, a strong  
221 overproduction of endogenous IGFBP3 was present in Tau-KO cells (**Fig 4A**). Reinforcing the link  
222 between PRC2 and IGFBP3, treatment of SH-SY5Y cells with Tazemetostat, a specific blocker of the  
223 histone methyl transferase activity of EZH2 (Straining and Eighmy, 2022), reduced H3K27me3 and  
224 increased IGFBP3 (**Fig 4B**). Lower EZH2 and SUZ12 and higher IGFBP3 was confirmed in an  
225 independent Tau-KO cell line (**Supplementary Fig 1**).

### 226 **3.4 Tau/PRC2/IGFBP3 triad in senescence**

227 Increased cellular expression of IGFBP3 is associated with autocrine and paracrine senescence  
228 induction (Elzi et al., 2012), and reduced PRC2 is also linked to increased cellular senescence (Ito et  
229 al., 2018). Furthermore, increased senescence is observed in Tau-KO cells (Sola et al., 2020). Thus,  
230 we postulated that PRC2-dependent de-repression of IGFBP3 in Tau-depleted cells may explain the  
231 induction of cellular senescence. We observed first that Tau depletion as well as PRC2 inhibition both  
232 increased the percentage of SH-SY5Y cells entering in senescence, as assessed by three independent  
233 markers: P16, senescence-associated  $\beta$ -galactosidase (SA- $\beta$ gal), and the number and size of lysosomes  
234 labelled with the acidotrophic LysoTracker dye (**Fig 5A**). Next, we reduced IGFBP3 expression in  
235 Tau-KO cells by a shRNA-based approach (**Fig 5B**) and found that this reduced senescence induction  
236 in Tau-KO cells (**Fig 5C**). Thus, we validated our hypothesis that increased senescence in Tau-KO SH-  
237 SY5Y cells was likely the consequence of decreased PRC2-dependent repression of IGFBP3  
238 expression.

## 239 **4 Discussion**

240 We report data demonstrating a non-canonical role of Tau as a modulator of the epigenetic activity  
241 of PRC2 inducing cellular senescence in neuroblastoma SH-SY5Y cells. In our study we identified a  
242 prevalent PRC2 signature for shared modulation of upregulated transcripts in Tau-depleted cells. PRC1  
243 and PRC2 are multi-subunit transcriptional repressors that crucially modulate chromatin structure and  
244 gene expression by distinct enzymatic activities (Vijayanathan et al., 2022). PRC1 is an E3 ubiquitin  
245 ligase that catalyzes H2A ubiquitination at lysine119, whereas PRC2 acts as a methyltransferase that  
246 generates H3K27me3 with some cross-talk between the two complexes (Guerard-Millet et al., 2021).  
247 Confirming the bioinformatics results, Tau depletion caused reduced cellular amounts of PRC2 and its  
248 product H3K27me3. Increased senescence status upon Tau-depletion was reproduced through

249 pharmacological inhibition of PRC2 in Tau-expressing cells. Finally, we report that reversing the up-  
250 regulation of the PRC2-target IGFBP3, impaired senescence induction in Tau-depleted cells.

251 Evidence exists for the implication of Tau in chromatin remodeling. A pioneering study investigated  
252 chromatin conformation in mouse and drosophila models of AD as well as in human diseased brain,  
253 whereby a general loss of heterochromatin was associated with aberrant gene expression in all three  
254 paradigms (Frost et al., 2014). More recently, binding of Tau to histones was linked to the maintenance  
255 of condensed chromatin (Rico et al., 2021). Thus, Tau may favor chromatin compaction for preventing  
256 aberrant gene transcription. Misfolding, hyperphosphorylation or sequestration of Tau in oligomers  
257 and fibrils, typical hallmarks of tauopathies, could all result in a negative regulation of this non-  
258 canonical function of Tau. In our study, we show that in addition to the direct interaction between Tau  
259 and histones (Rico et al., 2021), an indirect mechanism involving PRC2 is an additional instrument for  
260 modulating chromatin compaction.

261 The role of PRC2 in senescence was shown by findings indicating that impairment of its catalytic  
262 activity induces a delayed decrease in H3K27me3 at the CDKN2A locus, which upregulates p16, the  
263 SASP phenotype, and senescence (Ito et al., 2018). This function of PRC2 represents a target for  
264 anticancer therapies e.g., through EED inhibition associated to de-repression of SASP-encoding genes  
265 and entry of proliferative cancer cells in a senescent state (Chu et al., 2022). Beside the paradoxical  
266 implication in cancer (Yang et al., 2021), senescence contributes to neurodegenerative diseases.  
267 Senescent neurons, microglia, astrocytes and neuronal stem cells were found during the pathogenic  
268 process (Si et al., 2021). A recent study in a tauopathy mouse model supported a causal link between  
269 cell senescence and cognitive decline linked to neuronal loss. Indeed, p16INK4A-positive senescent  
270 glial cells were found associated to Tau lesions, and, strikingly, the clearance of these cells prevented  
271 Tau hyperphosphorylation, Tau fibril deposition, whilst preserving neuronal survival and cognitive  
272 functions (Bussian et al., 2018). We describe now a conceivable mechanism linking depletion of  
273 functional Tau in tauopathies and senescence induction.

274 Among the PRC2 targets, we identified IGFBP3 as a main driver of senescence resulting from Tau-  
275 depletion. Ectopic expression of the SASP component IGFBP3 or its administration to MCF7 or IMR-  
276 90 cells is sufficient to induce senescence, whereas IGFBP3 knock-down impairs doxorubicin-induced  
277 senescence (Elzi et al., 2012). Although the role of PRC2 and IGFBP3 were established independently,  
278 to our knowledge our study is the first one showing IGFBP3 as a main executor of PRC2-dependent  
279 senescence induction and its modulation by Tau protein levels.

280 PRC2 has numerous functions in the developing central nervous system, with many neurogenesis-  
281 linked genes regulated by the PRC2/H3K27 axis (Liu et al., 2017). PRC2 is essential in preserving  
282 neural progenitor cell identity and neuroepithelial integrity (Akizu et al., 2016). PRC2 deficiency in  
283 mice leads to aberrant gastrulation and lack of neural tissue (Schumacher et al., 1996). Later in  
284 development, a transcription pattern with a PRC2 signature drives neuronal migration and is essential  
285 for the organization of neural circuits (Zhao et al., 2015). The rare Weaver syndrome linked to  
286 developmental cognitive deficits is caused by autosomal dominant mutations in any one of the three  
287 PRC2 core components EZH2, EED and SUZ12 (Deevy and Bracken, 2019). However, PRC2 is also  
288 involved in neurodegeneration. PRC2 deficiency in striatal neurons of mice reactivates the deleterious  
289 expression of transcripts that are normally suppressed in these cells, ultimately causing premature  
290 lethality (Von Schimmelmänn et al., 2016). Additional studies implicated PRC2 in ataxia-  
291 telangiectasia (Li et al., 2013), Parkinson's disease, Huntington's disease and AD (Kuehner and Yao,  
292 2019). A meta-analysis of differentially methylated regions in prefrontal neocortex at different disease  
293 stages has identified in AD several hypermethylated regions, which were significantly enriched in  
294 polycomb repressed regions (Zhang et al., 2020). These data also link PCR2-dependent methylation of

295 H3 with that of CpG islands of the genome, another epigenetic mechanism of gene repression (Phillips,  
296 2008).

297 PRC2 lacks sequence-specific DNA-binding ability and therefore relies on accessory proteins for  
298 targeting specific loci. Factors contributing to selective PRC2 recruitment to chromatin are the  
299 interaction with sequence-specific transcription factors or RNAs, and or discerning chromatin features  
300 (Blackledge and Klose, 2021). In the fly, PRC2 activity is regulated through the interaction with  
301 transcription factors binding to polycomb response elements often located in proximal promoter  
302 regions of developmental genes (Kassis and Brown, 2013). However, the orthologue system was not  
303 found in mammals (Bauer et al., 2016). Rather, it is maybe replaced by the evolution of a mechanism  
304 based on non-methylated CpG islands (Ku et al., 2008) and the action of DNA-binding proteins binding  
305 to them. Proteins with such features are the PRC1.1 complex member KDM2B, or the PRC2-members  
306 PHF1, MTF2 and PHF19 (Owen and Davidovich, 2022).

307 PRC histone modifications are heritable over mitotic cell division providing an epigenetic memory  
308 for stable cell identity and adequate response to stress (Reinig et al., 2020). Thus, PRC2 dysfunction is  
309 frequently associated with neoplastic progression and is a target for anticancer therapy (Comet et al.,  
310 2016). Expression of its catalytic subunit EZH2 correlates with cell proliferation, and its aberrant  
311 overexpression is frequent in many types of cancer cells (Liu and Liu, 2022). However, in line with a  
312 role in tumor suppression, loss-of-function of PRC2 is also involved in cancer (Liu et al., 2017). PRC2  
313 modulation by Tau implicates this latter in the pathogenesis of cancer, supporting the observation that  
314 the Tau mRNA correlates with survival in several tumors (Gargini et al., 2019, Papin and Paganetti,  
315 2020). The mechanism explaining this correlation is unknown but may involve the non-canonical role  
316 of Tau in modulating chromatin compaction and senescence induction. This may open new therapeutic  
317 opportunities for neurodegenerative diseases and cancer.

## 318 **5 Conflict of Interest**

319 The authors declare that the research was conducted in the absence of any commercial or financial  
320 relationships that could be construed as a potential conflict of interest.

## 321 **6 Author Contributions**

322 Conceptualization: SP, PP  
323 Methods and investigations: CM, MS, EP, MB, AR  
324 Supervision: SP, PP  
325 Writing (original draft): SP  
326 Writing (review & editing): all co-authors

## 327 **7 Funding**

328 The Paganetti's lab is founded by the Gelu Foundation, the Mecri Foundation and The Charitable  
329 Gabriele Foundation.

## 330 **8 Acknowledgments**

331 We thank the whole laboratory for support and advice during this study.

## 332 **9 Data Availability Statement**



333 The RNA-Seq data have the accession no. E-MTAB-8166 and were uploaded on  
334 [https://www.ebi.ac.uk/biostudies/arrayexpress/studies/E-MTAB-8166?key=64a67428-adb9-4681-](https://www.ebi.ac.uk/biostudies/arrayexpress/studies/E-MTAB-8166?key=64a67428-adb9-4681-99c9-98910b78ed4c)  
335 [99c9-98910b78ed4c](https://www.ebi.ac.uk/biostudies/arrayexpress/studies/E-MTAB-8166?key=64a67428-adb9-4681-99c9-98910b78ed4c).  
336

## 337 **References**

- 338 Akizu, N., García, M. A., Estarás, C., Fueyo, R., Badosa, C., De La Cruz, X. & Martínez-Balbás, M.  
339 A. 2016. EZH2 regulates neuroepithelium structure and neuroblast proliferation by repressing  
340 p21. *Open Biol*, 6, 150227.
- 341 Basisty, N., Kale, A., Patel, S., Campisi, J. & Schilling, B. 2020. The power of proteomics to monitor  
342 senescence-associated secretory phenotypes and beyond: toward clinical applications. *Expert*  
343 *Rev Proteomics*, 17, 297-308.
- 344 Bauer, M., Trupke, J. & Ringrose, L. 2016. The quest for mammalian Polycomb response elements:  
345 are we there yet? *Chromosoma*, 125, 471-96.
- 346 Blackledge, N. P. & Klose, R. J. 2021. The molecular principles of gene regulation by Polycomb  
347 repressive complexes. *Nat Rev Mol Cell Biol*, 22, 815-833.
- 348 Bussian, T. J., Aziz, A., Meyer, C. F., Swenson, B. L., Van Deursen, J. M. & Baker, D. J. 2018.  
349 Clearance of senescent glial cells prevents tau-dependent pathology and cognitive decline.  
350 *Nature*, 562, 578-582.
- 351 Chen, E. Y., Tan, C. M., Kou, Y., Duan, Q., Wang, Z., Meirelles, G. V., Clark, N. R. & Ma'ayan, A.  
352 2013. Enrichr: interactive and collaborative HTML5 gene list enrichment analysis tool. *BMC*  
353 *Bioinformatics*, 14, 128.
- 354 Chen, S., Huang, T., Zhou, Y., Han, Y., Xu, M. & Gu, J. 2017. AfterQC: automatic filtering,  
355 trimming, error removing and quality control for fastq data. *BMC Bioinformatics*, 18, 80.
- 356 Chu, L., Qu, Y., An, Y., Hou, L., Li, J., Li, W., Fan, G., Song, B.-L., Li, E., Zhang, L. & Qi, W.  
357 2022. Induction of senescence-associated secretory phenotype underlies the therapeutic  
358 efficacy of PRC2 inhibition in cancer. *Cell Death & Disease*, 13, 155.
- 359 Cimini, S., Giaccone, G., Tagliavini, F., Costantino, M., Perego, P. & Rossi, G. 2022. P301L tau  
360 mutation leads to alterations of cell cycle, DNA damage response and apoptosis: Evidence for  
361 a role of tau in cancer. *Biochem Pharmacol*, 200, 115043.
- 362 Comet, I., Riising, E. M., Leblanc, B. & Helin, K. 2016. Maintaining cell identity: PRC2-mediated  
363 regulation of transcription and cancer. *Nature Reviews Cancer*, 16, 803-810.
- 364 Cross, D., Tapia, L., Garrido, J. & Maccioni, R. B. 1996. Tau-like proteins associated with  
365 centrosomes in cultured cells. *Exp Cell Res*, 229, 378-87.
- 366 Deevy, O. & Bracken, A. P. 2019. PRC2 functions in development and congenital disorders.  
367 *Development*, 146.
- 368 Dobin, A., Davis, C. A., Schlesinger, F., Drenkow, J., Zaleski, C., Jha, S., Batut, P., Chaisson, M. &  
369 Gingeras, T. R. 2013. STAR: ultrafast universal RNA-seq aligner. *Bioinformatics*, 29, 15-21.
- 370 Elzi, D. J., Lai, Y., Song, M., Hakala, K., Weintraub, S. T. & Shio, Y. 2012. Plasminogen activator  
371 inhibitor 1 - insulin-like growth factor binding protein 3 cascade regulates stress-induced  
372 senescence. *Proceedings of the National Academy of Sciences*, 109, 12052-12057.
- 373 Frost, B., Hemberg, M., Lewis, J. & Feany, M. B. 2014. Tau promotes neurodegeneration through  
374 global chromatin relaxation. *Nat Neurosci*, 17, 357-66.
- 375 García-Alcalde, F., Okonechnikov, K., Carbonell, J., Cruz, L. M., Götz, S., Tarazona, S., Dopazo, J.,  
376 Meyer, T. F. & Conesa, A. 2012. Qualimap: evaluating next-generation sequencing alignment  
377 data. *Bioinformatics*, 28, 2678-9.
- 378 Gargini, R., Segura-Collar, B., Herránz, B., García-Escudero, V., Romero-Bravo, A., Núñez, F. J.,  
379 García-Pérez, D., Gutiérrez-Guamán, J., Ayuso-Sacido, A., Seoane, J., Pérez-Núñez, A.,  
380 Sepúlveda-Sánchez, J. M., Hernández-Laín, A., Castro, M. G., García-Escudero, R., Ávila, J.

- 381 & Sánchez-Gómez, P. 2020. The IDH-TAU-EGFR triad defines the neovascular landscape of  
382 diffuse gliomas. *Sci Transl Med*, 12.
- 383 Gargini, R., Segura-Collar, B. & Sánchez-Gómez, P. 2019. Novel Functions of the  
384 Neurodegenerative-Related Gene Tau in Cancer. *Front Aging Neurosci*, 11, 231.
- 385 Greenwood, J. A. & Johnson, G. V. 1995. Localization and in situ phosphorylation state of nuclear  
386 tau. *Exp Cell Res*, 220, 332-7.
- 387 Guerard-Millet, F., Gentile, C., Paul, R., Mayran, A. & Kmita, M. 2021. Polycomb Repressive  
388 Complexes occupancy reveals PRC2-independent PRC1 critical role in the control of limb  
389 development. *bioRxiv*, 2021.10.28.466236.
- 390 Guo, Y., Zhao, S. & Wang, G. G. 2021. Polycomb Gene Silencing Mechanisms: PRC2 Chromatin  
391 Targeting, H3K27me3 'Readout', and Phase Separation-Based Compaction. *Trends in*  
392 *Genetics*, 37, 547-565.
- 393 Harrow, J., Frankish, A., Gonzalez, J. M., Tapanari, E., Diekhans, M., Kokocinski, F., Aken, B. L.,  
394 Barrell, D., Zadissa, A., Searle, S., Barnes, I., Bignell, A., Boychenko, V., Hunt, T., Kay, M.,  
395 Mukherjee, G., Rajan, J., Despacio-Reyes, G., Saunders, G., Steward, C., Harte, R., Lin, M.,  
396 Howald, C., Tanzer, A., Derrien, T., Chrast, J., Walters, N., Balasubramanian, S., Pei, B.,  
397 Tress, M., Rodriguez, J. M., Ezkurdia, I., Van Baren, J., Brent, M., Haussler, D., Kellis, M.,  
398 Valencia, A., Raymond, A., Gerstein, M., Guigo, R. & Hubbard, T. J. 2012. GENCODE: the  
399 reference human genome annotation for The ENCODE Project. *Genome Res*, 22, 1760-74.
- 400 Hutton, M., Lendon, C. L., Rizzu, P., Baker, M., Froelich, S., Houlden, H., Pickering-Brown, S.,  
401 Chakraverty, S., Isaacs, A., Grover, A., Hackett, J., Adamson, J., Lincoln, S., Dickson, D.,  
402 Davies, P., Petersen, R. C., Stevens, M., De Graaff, E., Wauters, E., Van Baren, J.,  
403 Hillebrand, M., Joosse, M., Kwon, J. M., Nowotny, P., Che, L. K., Norton, J., Morris, J. C.,  
404 Reed, L. A., Trojanowski, J., Basun, H., Lannfelt, L., Neystat, M., Fahn, S., Dark, F.,  
405 Tannenberg, T., Dodd, P. R., Hayward, N., Kwok, J. B., Schofield, P. R., Andreadis, A.,  
406 Snowden, J., Craufurd, D., Neary, D., Owen, F., Oostra, B. A., Hardy, J., Goate, A., Van  
407 Swieten, J., Mann, D., Lynch, T. & Heutink, P. 1998. Association of missense and 5'-splice-  
408 site mutations in tau with the inherited dementia FTDP-17. *Nature*, 393, 702-5.
- 409 Ito, T., Teo, Y. V., Evans, S. A., Neretti, N. & Sedivy, J. M. 2018. Regulation of Cellular Senescence  
410 by Polycomb Chromatin Modifiers through Distinct DNA Damage- and Histone Methylation-  
411 Dependent Pathways. *Cell Rep*, 22, 3480-3492.
- 412 Jeganathan, S., Von Bergen, M., Brütlich, H., Steinhoff, H. J. & Mandelkow, E. 2006. Global hairpin  
413 folding of tau in solution. *Biochemistry*, 45, 2283-93.
- 414 Josephs, K. A. 2018. Rest in peace FTDP-17. *Brain*, 141, 324-331.
- 415 Kassis, J. A. & Brown, J. L. 2013. Polycomb group response elements in *Drosophila* and vertebrates.  
416 *Adv Genet*, 81, 83-118.
- 417 Klein, H.-U., McCabe, C., Gjonjeska, E., Sullivan, S. E., Kaskow, B. J., Tang, A., Smith, R. V., Xu, J.,  
418 Pfenning, A. R., Bernstein, B. E., Meissner, A., Schneider, J. A., Mostafavi, S., Tsai, L.-H.,  
419 Young-Pearse, T. L., Bennett, D. A. & De Jager, P. L. 2019. Epigenome-wide study uncovers  
420 large-scale changes in histone acetylation driven by tau pathology in aging and Alzheimer's  
421 human brains. *Nature Neuroscience*, 22, 37-46.
- 422 Ku, M., Koche, R. P., Rheinbay, E., Mendenhall, E. M., Endoh, M., Mikkelsen, T. S., Presser, A.,  
423 Nusbaum, C., Xie, X., Chi, A. S., Adli, M., Kasif, S., Ptaszek, L. M., Cowan, C. A., Lander,  
424 E. S., Koseki, H. & Bernstein, B. E. 2008. Genomewide analysis of PRC1 and PRC2  
425 occupancy identifies two classes of bivalent domains. *PLoS Genet*, 4, e1000242.
- 426 Kuehner, J. N. & Yao, B. 2019. The Dynamic Partnership of Polycomb and Trithorax in Brain  
427 Development and Diseases. *Epigenomes*, 3, 17-24.
- 428 Kuleshov, M. V., Jones, M. R., Rouillard, A. D., Fernandez, N. F., Duan, Q., Wang, Z., Koplev, S.,  
429 Jenkins, S. L., Jagodnik, K. M., Lachmann, A., Mcdermott, M. G., Monteiro, C. D.,

- 430 Gundersen, G. W. & Ma'ayan, A. 2016. Enrichr: a comprehensive gene set enrichment  
431 analysis web server 2016 update. *Nucleic Acids Res*, 44, W90-7.
- 432 Lang, A.-L., Eulalio, T., Fox, E., Yakabi, K., Bukhari, S. A., Kawas, C. H., Corrada, M. M.,  
433 Montgomery, S. B., Heppner, F. L., Capper, D., Nachun, D. & Montine, T. J. 2022.  
434 Methylation differences in Alzheimer's disease neuropathologic change in the aged human  
435 brain. *Acta Neuropathologica Communications*, 10, 174.
- 436 Laugesen, A., Højfeldt, J. W. & Helin, K. 2016. Role of the Polycomb Repressive Complex 2  
437 (PRC2) in Transcriptional Regulation and Cancer. *Cold Spring Harbor Perspectives in  
438 Medicine*, 6.
- 439 Li, J., Hart, R. P., Mallimo, E. M., Swerdel, M. R., Kusnecov, A. W. & Herrup, K. 2013. EZH2-  
440 mediated H3K27 trimethylation mediates neurodegeneration in ataxia-telangiectasia. *Nat  
441 Neurosci*, 16, 1745-53.
- 442 Liu, P.-P., Xu, Y.-J., Teng, Z.-Q. & Liu, C.-M. 2017. Polycomb Repressive Complex 2: Emerging  
443 Roles in the Central Nervous System. *The Neuroscientist*, 24, 208-220.
- 444 Liu, X. & Liu, X. 2022. PRC2, Chromatin Regulation, and Human Disease: Insights From Molecular  
445 Structure and Function. *Front Oncol*, 12, 894585.
- 446 Long, J. M. & Holtzman, D. M. 2019. Alzheimer Disease: An Update on Pathobiology and  
447 Treatment Strategies. *Cell*, 179, 312-339.
- 448 Loomis, P. A., Howard, T. H., Castleberry, R. P. & Binder, L. I. 1990. Identification of nuclear tau  
449 isoforms in human neuroblastoma cells. *Proc Natl Acad Sci U S A*, 87, 8422-6.
- 450 Love, M. I., Huber, W. & Anders, S. 2014. Moderated estimation of fold change and dispersion for  
451 RNA-seq data with DESeq2. *Genome Biol*, 15, 550.
- 452 Lovell, M. A. & Markesbery, W. R. 2007. Oxidative DNA damage in mild cognitive impairment and  
453 late-stage Alzheimer's disease. *Nucleic Acids Res*, 35, 7497-504.
- 454 Ludolph, A. C., Kassubek, J., Landwehrmeyer, B. G., Mandelkow, E., Mandelkow, E. M., Burn, D.  
455 J., Caparros-Lefebvre, D., Frey, K. A., De Yebenes, J. G., Gasser, T., Heutink, P., Höglinger,  
456 G., Jamrozik, Z., Jellinger, K. A., Kazantsev, A., Kretschmar, H., Lang, A. E., Litvan, I.,  
457 Lucas, J. J., McGeer, P. L., Melquist, S., Oertel, W., Otto, M., Paviour, D., Reum, T., Saint-  
458 Raymond, A., Steele, J. C., Tolnay, M., Tumani, H., Van Swieten, J. C., Vanier, M. T.,  
459 Vonsattel, J. P., Wagner, S. & Wszolek, Z. K. 2009. Tauopathies with parkinsonism: clinical  
460 spectrum, neuropathologic basis, biological markers, and treatment options. *Eur J Neurol*, 16,  
461 297-309.
- 462 Montalbano, M., Jaworski, E., Garcia, S., Ellsworth, A., McCallen, S., Routh, A. & Kaye, R. 2021.  
463 Tau Modulates mRNA Transcription, Alternative Polyadenylation Profiles of hnRNPs,  
464 Chromatin Remodeling and Spliceosome Complexes. *Front Mol Neurosci*, 14, 742790.
- 465 Montalbano, M., McCallen, S., Puangmalai, N., Sengupta, U., Bhatt, N., Johnson, O. D., Kharas, M.  
466 G. & Kaye, R. 2020. RNA-binding proteins Musashi and tau soluble aggregates initiate  
467 nuclear dysfunction. *Nat Commun*, 11, 4305.
- 468 Moritz, L. E. & Trievel, R. C. 2018. Structure, mechanism, and regulation of polycomb-repressive  
469 complex 2. *J Biol Chem*, 293, 13805-13814.
- 470 Mullaart, E., Boerrigter, M. E., Ravid, R., Swaab, D. F. & Vijg, J. 1990. Increased levels of DNA  
471 breaks in cerebral cortex of Alzheimer's disease patients. *Neurobiol Aging*, 11, 169-73.
- 472 Owen, B. M. & Davidovich, C. 2022. DNA binding by polycomb-group proteins: searching for the  
473 link to CpG islands. *Nucleic Acids Res*, 50, 4813-4839.
- 474 Papin, S. & Paganetti, P. 2020. Emerging Evidences for an Implication of the Neurodegeneration-  
475 Associated Protein TAU in Cancer. *Brain Sci*, 10.
- 476 Phillips, T. 2008. The Role of Methylation in Gene Expression. *Nature Education*, 1.

- 477 Reinig, J., Ruge, F., Howard, M. & Ringrose, L. 2020. A theoretical model of Polycomb/Trithorax  
478 action unites stable epigenetic memory and dynamic regulation. *Nature Communications*, 11,  
479 4782.
- 480 Rico, T., Gilles, M., Chauderlier, A., Comptdaer, T., Magnez, R., Chwastyniak, M., Drobecq, H.,  
481 Pinet, F., Thuru, X., Buée, L., Galas, M. C. & Lefebvre, B. 2021. Tau Stabilizes Chromatin  
482 Compaction. *Front Cell Dev Biol*, 9, 740550.
- 483 Rossi, G., Dalpra, L., Crosti, F., Lissoni, S., Sciacca, F. L., Catania, M., Di Fede, G., Mangieri, M.,  
484 Giaccone, G., Croci, D. & Tagliavini, F. 2008. A new function of microtubule-associated  
485 protein tau: involvement in chromosome stability. *Cell Cycle*, 7, 1788-94.
- 486 Rossi, G., Redaelli, V., Contiero, P., Fabiano, S., Tagliabue, G., Perego, P., Benussi, L., Bruni, A. C.,  
487 Filippini, G., Farinotti, M., Giaccone, G., Buiatiotis, S., Manzoni, C., Ferrari, R. & Tagliavini,  
488 F. 2018. Tau Mutations Serve as a Novel Risk Factor for Cancer. *Cancer Res*, 78, 3731-3739.
- 489 Schumacher, A., Faust, C. & Magnuson, T. 1996. Positional cloning of a global regulator of anterior-  
490 posterior patterning in mice. *Nature*, 383, 250-253.
- 491 Shireby, G., Dempster, E. L., Policicchio, S., Smith, R. G., Pishva, E., Chioza, B., Davies, J. P.,  
492 Burrage, J., Lunnon, K., Seiler Vellame, D., Love, S., Thomas, A., Brookes, K., Morgan, K.,  
493 Francis, P., Hannon, E. & Mill, J. 2022. DNA methylation signatures of Alzheimer's disease  
494 neuropathology in the cortex are primarily driven by variation in non-neuronal cell-types.  
495 *Nature Communications*, 13, 5620.
- 496 Si, Z., Sun, L. & Wang, X. 2021. Evidence and perspectives of cell senescence in neurodegenerative  
497 diseases. *Biomedicine & Pharmacotherapy*, 137, 111327.
- 498 Sola, M., Magrin, C., Pedrioli, G., Pinton, S., Salvadè, A., Papin, S. & Paganetti, P. 2020. Tau affects  
499 P53 function and cell fate during the DNA damage response. *Commun Biol*, 3, 245.
- 500 Spillantini, M. G., Murrell, J. R., Goedert, M., Farlow, M. R., Klug, A. & Ghetti, B. 1998. Mutation  
501 in the tau gene in familial multiple system tauopathy with presenile dementia. *Proc Natl Acad  
502 Sci U S A*, 95, 7737-41.
- 503 Straining, R. & Eighmy, W. 2022. Tazemetostat: EZH2 Inhibitor. *J Adv Pract Oncol*, 13, 158-163.
- 504 Sultan, A., Nesslany, F., Violet, M., Begard, S., Loyens, A., Talahari, S., Mansuroglu, Z., Marzin, D.,  
505 Sergeant, N., Humez, S., Colin, M., Bonnefoy, E., Buee, L. & Galas, M. C. 2011. Nuclear  
506 tau, a key player in neuronal DNA protection. *J Biol Chem*, 286, 4566-75.
- 507 Thurston, V. C., Zinkowski, R. P. & Binder, L. I. 1996. Tau as a nucleolar protein in human  
508 nonneural cells in vitro and in vivo. *Chromosoma*, 105, 20-30.
- 509 Ulrich, G., Salvade, A., Boersema, P., Cali, T., Foglieni, C., Sola, M., Picotti, P., Papin, S. &  
510 Paganetti, P. 2018. Phosphorylation of nuclear Tau is modulated by distinct cellular  
511 pathways. *Sci Rep*, 8, 17702.
- 512 Vijayanathan, M., Trejo-Arellano, M. G. & Mozgová, I. 2022. Polycomb Repressive Complex 2 in  
513 Eukaryotes-An Evolutionary Perspective. *Epigenomes*, 6.
- 514 Violet, M., Delattre, L., Tardivel, M., Sultan, A., Chauderlier, A., Caillierez, R., Talahari, S.,  
515 Nesslany, F., Lefebvre, B., Bonnefoy, E., Buee, L. & Galas, M. C. 2014. A major role for Tau  
516 in neuronal DNA and RNA protection in vivo under physiological and hyperthermic  
517 conditions. *Front Cell Neurosci*, 8, 84.
- 518 Von Schimmelmann, M., Feinberg, P. A., Sullivan, J. M., Ku, S. M., Badimon, A., Duff, M. K.,  
519 Wang, Z., Lachmann, A., Dewell, S., Ma'ayan, A., Han, M. H., Tarakhovskiy, A. & Schaefer,  
520 A. 2016. Polycomb repressive complex 2 (PRC2) silences genes responsible for  
521 neurodegeneration. *Nat Neurosci*, 19, 1321-30.
- 522 Wang, L., Wang, S. & Li, W. 2012. RSeQC: quality control of RNA-seq experiments.  
523 *Bioinformatics*, 28, 2184-5.
- 524 Wingett, S. W. & Andrews, S. 2018. FastQ Screen: A tool for multi-genome mapping and quality  
525 control. *F1000Res*, 7, 1338.

526 Xie, Z., Bailey, A., Kuleshov, M. V., Clarke, D. J. B., Evangelista, J. E., Jenkins, S. L., Lachmann,  
 527 A., Wojciechowicz, M. L., Kropiwnicki, E., Jagodnik, K. M., Jeon, M. & Ma'ayan, A. 2021.  
 528 Gene Set Knowledge Discovery with Enrichr. *Current Protocols*, 1, e90.  
 529 Yang, J., Liu, M., Hong, D., Zeng, M. & Zhang, X. 2021. The Paradoxical Role of Cellular  
 530 Senescence in Cancer. *Front Cell Dev Biol*, 9, 722205.  
 531 Zhang, L., Silva, T. C., Young, J. I., Gomez, L., Schmidt, M. A., Hamilton-Nelson, K. L., Kunkle, B.  
 532 W., Chen, X., Martin, E. R. & Wang, L. 2020. Epigenome-wide meta-analysis of DNA  
 533 methylation differences in prefrontal cortex implicates the immune processes in Alzheimer's  
 534 disease. *Nat Commun*, 11, 6114.  
 535 Zhao, L., Li, J., Ma, Y., Wang, J., Pan, W., Gao, K., Zhang, Z., Lu, T., Ruan, Y., Yue, W., Zhao, S.,  
 536 Wang, L. & Zhang, D. 2015. Ezh2 is involved in radial neuronal migration through regulating  
 537 Reelin expression in cerebral cortex. *Sci Rep*, 5, 15484.

538

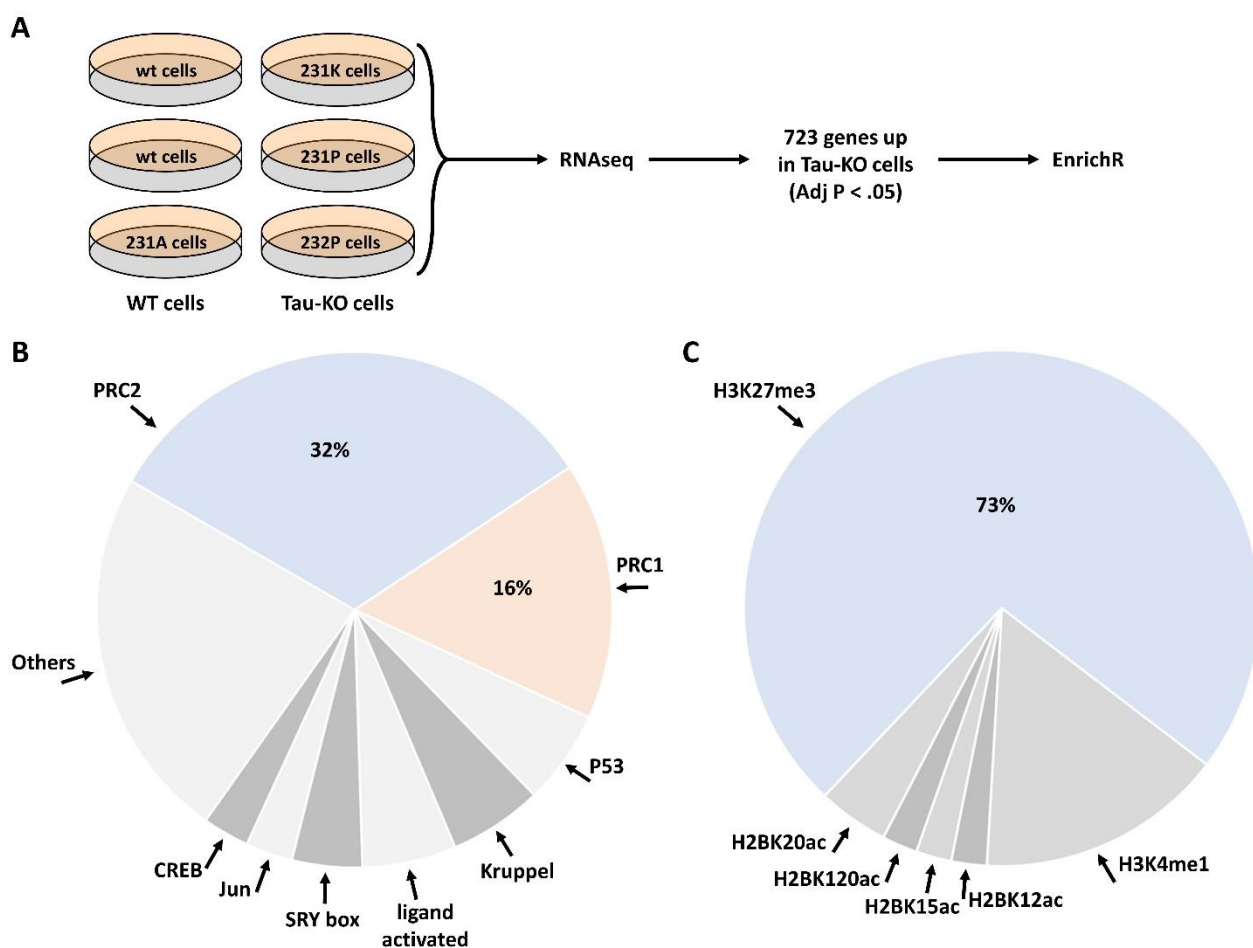

539

540 **Figure 1. Deregulation of the PRC2 pathway in human Tau-KO SH-SY5Y neuroblastoma cells.**  
 541 (A). Scheme of the procedure for the RNAseq and EnrichR analyses in Tau-expressing (WT) and  
 542 Tau-knock-out (Tau-KO) cells. (B-C). The EnrichR analysis based on 723 upregulated genes in Tau-  
 543 KO cells resulted in the enrichment of the PRC2 pathway with the ChIP datasets (B) and of  
 544 H3K27me3 with the epigenomics datasets (C).

545

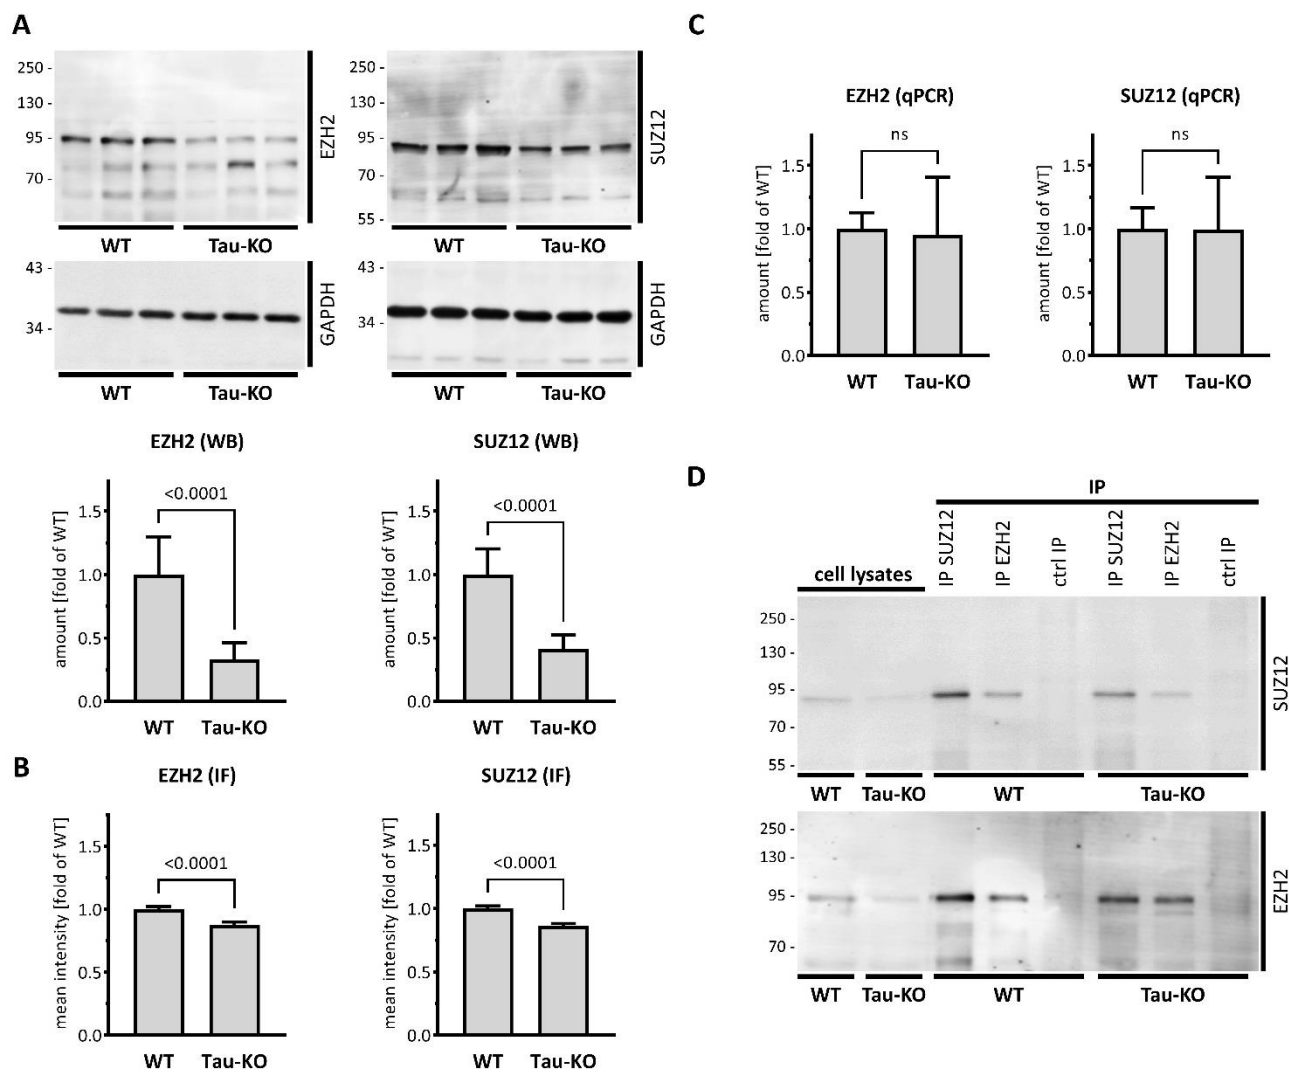

546

547 **Figure 2. Reduced PRC2 complex in Tau-KO SH-SY5Y cells.**

548 (A). Shown are matched protein amounts of parental (WT) or Tau-KO cell lysates analyzed by  
 549 western blot (biological triplicates on a single gel) with EZH2, SUZ12 or GAPDH primary  
 550 antibodies and anti-rabbit IgG IRDye 800CW secondary antibody. The EZH2 and SUZ12 signals  
 551 were normalized on the respective GAPDH signals and reported as fold of WT; mean  $\pm$  SD of 9  
 552 biological replicates, unpaired Mann-Whitney test. (B). Determination of nuclear EZH2 or SUZ12  
 553 mean fluorescent intensity analyzed by immune fluorescence staining and laser confocal microscopy  
 554 with EZH2 or SUZ12 antibodies revealed with an anti-rabbit AlexaFluor 488 antibody. Data obtained  
 555 with a DAPI nuclear mask (ImageJ) are reported as fold of WT; mean  $\pm$  SEM of 292-475 nuclei from  
 556 two (EZH2) or three (SUZ12) independent experiments, unpaired Mann-Whitney test. (C). Shown  
 557 are RT-PCR determination of mRNA with specific primers for EZH2 or SUZ12. Normalization was  
 558 performed on the geometric mean of the GAPDH and HPRT1 mRNA values and reported as fold of  
 559 WT; mean  $\pm$  SD of 12 biological replicates, unpaired Mann-Whitney test. (D). Shown are matched  
 560 protein amounts of cell lysates subjected to immune isolation (IP) with EZH2 or SUZ12 antibodies or  
 561 matched amounts of control antibodies (ctrl IP). Samples were resolved on a single same gel and  
 562 analyzed by western blot with EZH2 or SUZ12 antibodies and secondary anti-rabbit IgG IRDye  
 563 800CW antibody.

564

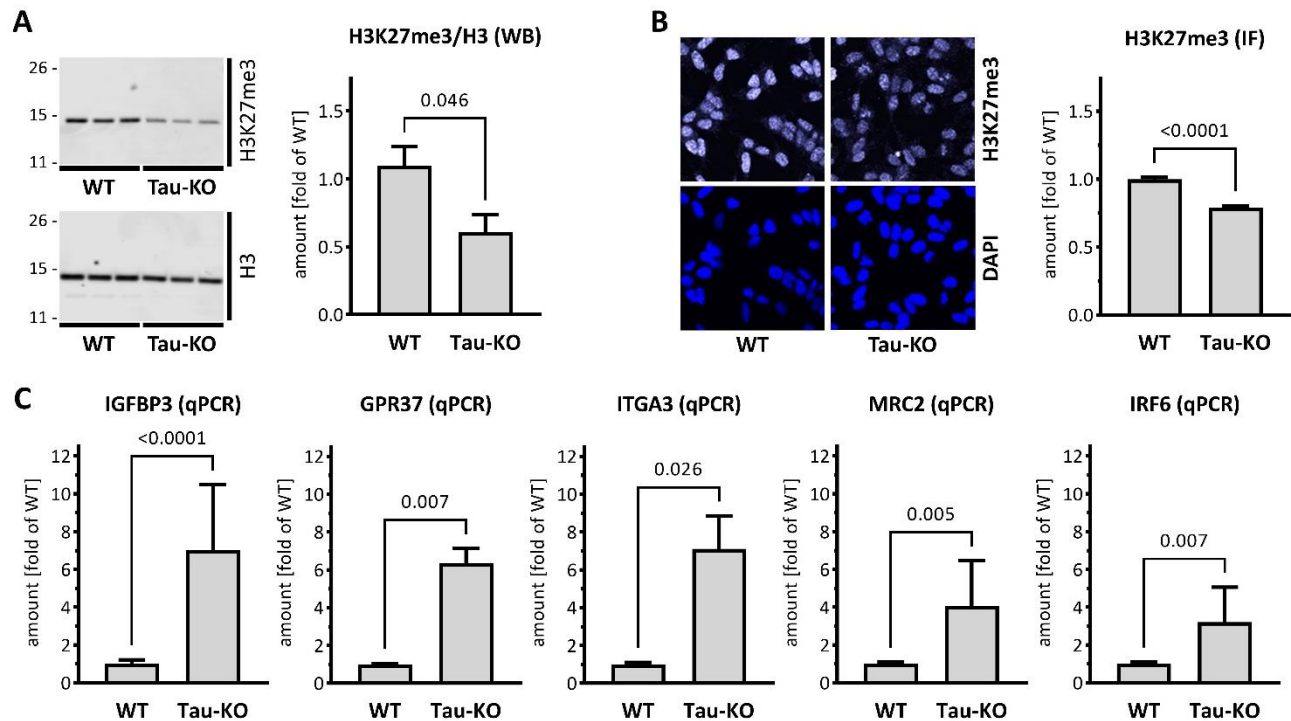

565

566 **Figure 3. Reduced PRC2 activity in Tau-KO SH-SY5Y cells.**

567 (A). Shown are matched protein amounts of parental (WT) or Tau-KO cell lysates analyzed by  
568 western blot (biological triplicates on a single gel) with H3K27me3, H3 or GAPDH primary  
569 antibodies and anti-rabbit IgG IRDye 800CW secondary antibody. The H3K27me3 and H3 signals  
570 were normalized for GAPDH and reported as fold of WT for the H3K27me3/H3 ratios; mean  $\pm$  SD  
571 of 8-9 biological replicates, unpaired Mann-Whitney test. (B). Nuclear H3K27me3 mean fluorescent  
572 intensity was determined by immune fluorescence staining and laser confocal microscopy. Data  
573 obtained with a DAPI nuclear mask (ImageJ) are reported as fold of WT; mean  $\pm$  SEM of 695-716  
574 nuclei from five independent experiments, unpaired Mann-Whitney test. (C). Shown are RT-PCR  
575 determination of mRNA with specific primers as indicated. Normalization was performed on the  
576 geometric mean of the GAPDH and HPRT1 mRNA values and reported as fold of WT; mean  $\pm$  SD  
577 of 3-12 biological replicates, unpaired Mann-Whitney test.

578

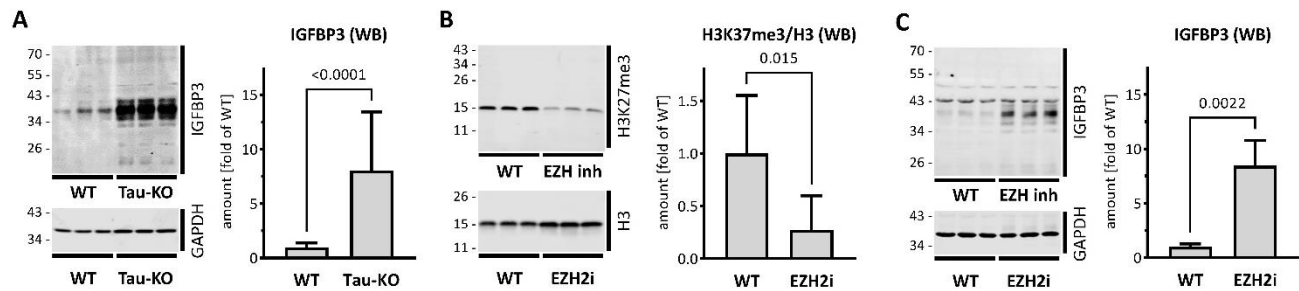

579

580 **Figure 4. Increased IGFBP3 in SH-SY5Y cells after Tau-KO or PRC2 inhibition.**

581 (A). Shown are matched protein amounts of parental (WT) or Tau-KO cell lysates analyzed by  
582 western blot (biological triplicates on a single gel) with IGFBP3 or GAPDH primary antibodies and  
583 anti-mouse IgG IRDye 680RD or anti-rabbit IgG IRDye 800CW secondary antibodies. The IGFBP3  
584 signals were normalized for GAPDH and reported as fold of WT; mean  $\pm$  SD of 8-9 biological  
585 replicates, unpaired Mann-Whitney test. (B-C). Shown is a western blot of matched protein amounts  
586 of SH-SY5Y cells treated for 4 days in the absence (WT) or presence of 10  $\mu$ M Tazemetostat  
587 (EZH2i). Biological triplicates on a single gel were probed (B) with H3K27me3, H3 or GAPDH  
588 primary antibodies and anti-rabbit IgG IRDye 800CW secondary antibody or (C) with IGFBP3 or  
589 GAPDH antibodies. Protein signals were normalized for GAPDH and reported as fold of WT; mean  
590  $\pm$  SD of 6 biological replicates, unpaired Mann-Whitney test.

591



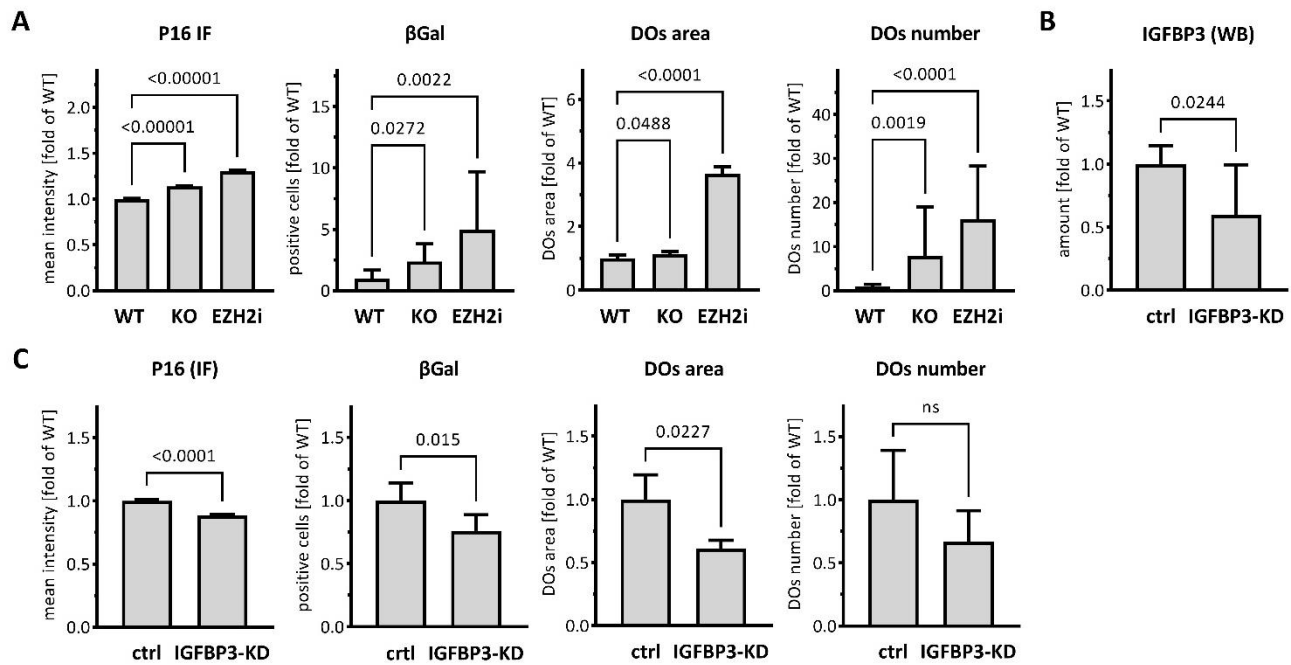

592

593 **Figure 5. Increased IGFBP3-induced senescence in cells.**

594 (A). Senescence markers were analyzed in parental (WT), Tau-KO or 10  $\mu$ M Tazemetostat-treated  
595 parental (EZH2i) cells. The nuclear P16 fluorescent intensity (P16 IF) was determined with a DAPI  
596 nuclear mask (ImageJ) by immune fluorescence staining and laser confocal microscopy and reported  
597 as fold of WT; mean  $\pm$  sem of 1991-3153 nuclei. The percent of senescence-associated  $\beta$ Gal positive  
598 cells ( $\beta$ Gal) was determined by automated cell imaging; mean  $\pm$  SD of 7-14 fields. Living cells  
599 labeled with the acidotrophic dye LysoTracker (DOs) were imaged on a laser confocal microscope  
600 and analyzed for the size (area of 643-3429 DOs) and mean number per cell (13-18 fields) of  
601 LysoTracker-positive organelles (ImageJ). Values are reported as fold of WT; mean  $\pm$  sem (area) or  
602  $\pm$  SD (number), non-parametric Krustal-Wallis and Dunn's multiple comparison test. (B). Matched  
603 protein amounts of SH-SY5Y cells transduced with mock (ctrl) or IGFBP3 shRNA (IGFBP3-KD)  
604 pseudo lentiviral particles were analyzed by western blot (biological triplicates on a single gel) with  
605 IGFBP3 or GAPDH primary antibodies and anti-mouse IgG IRDye 680RD or anti-rabbit IgG IRDye  
606 800CW secondary antibodies. The IGFBP3 signals were normalized for GAPDH and reported as fold  
607 of WT; mean  $\pm$  SD of 9 biological replicates, unpaired Mann-Whitney test. (C). As in (A) for SH-  
608 SY5Y cells transduced with mock (ctrl) or IGFBP3 shRNA (IGFBP3-KD) pseudo lentiviral particles.  
609 P16 IF: mean  $\pm$  sem of 669-881 nuclei;  $\beta$ Gal: mean  $\pm$  SD of 6 fields. DOs; area of 456-551 DOs,  
610 mean number per cell (5 fields) of LysoTracker-positive organelles (ImageJ). Values are reported as  
611 fold of WT; mean  $\pm$  sem (area) or  $\pm$  SD (number); unpaired Mann-Whitney test.

612

613 Supplementary Figure 1

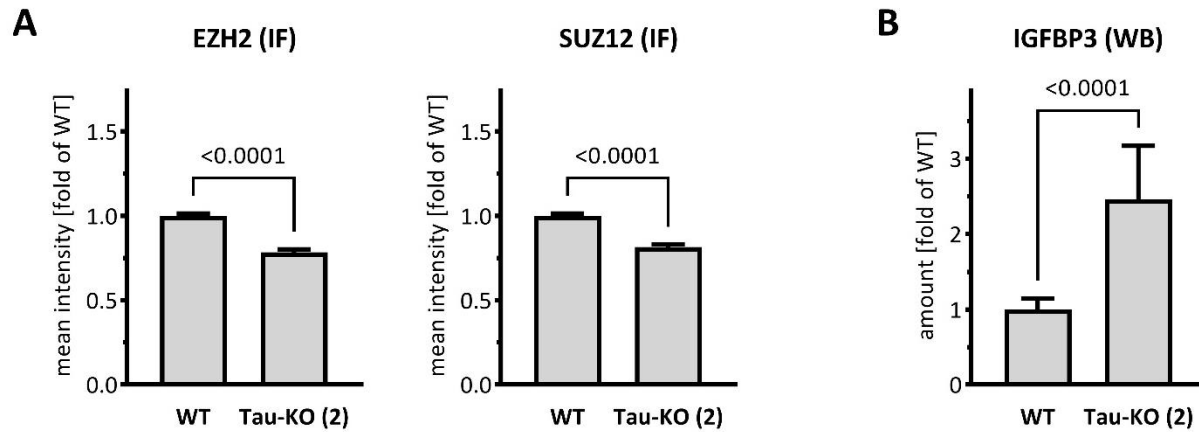

614

615 **Supplementary Figure 1. Reduced EZH2/SUZ12 and increased IGFBP3 in an independent**  
616 **Tau-KO SH-SY5Y cell line.**

617 (A). Nuclear EZH2 or SUZ12 mean fluorescent intensity was analyzed by immune fluorescence  
618 staining and laser confocal microscopy with EZH2 or SUZ12 antibodies revealed with an anti-rabbit  
619 AlexaFluor 488 antibody. Data obtained with a DAPI nuclear mask (ImageJ) are reported as fold of  
620 WT; mean  $\pm$  sem of 202-208 nuclei (EZH2) or 182-184 nuclei (SUZ12), unpaired Mann-Whitney  
621 test. (B). IGFBP3 was determined by western blot for matched protein amounts of parental (WT) or  
622 Tau-KO (2) cell lysates (biological triplicates on a single gel). Data are reported as fold of WT, mean  
623  $\pm$  SD of 9 biological replicates, unpaired Mann-Whitney test.

624 **Supplementary Table I. Transcripts upregulated in human Tau-KO SH-SY5Y cells (Adj P**  
 625 **<.05) listed in order of decreasing significance**

| Symbol   | log2FC | Symbol       | log2FC | Symbol      | log2FC | Symbol       | log2FC |
|----------|--------|--------------|--------|-------------|--------|--------------|--------|
| CDKN1A   | 2.24   | TMEM63A      | 2.19   | WWC3        | 1.39   | PACSIN2      | 0.39   |
| C22orf34 | 8.85   | PDGFA        | 4.48   | RELB        | 1.75   | AGA          | 1.82   |
| SLC12A7  | 2.93   | ASB9         | 3.14   | LGR5        | 2.09   | PRCP         | 0.58   |
| EVC2     | 7.23   | ZFP36L2      | 0.76   | GPX7        | 0.86   | NTRK2        | 3.13   |
| DCN      | 10.43  | CILP         | 2.70   | SLC10A3     | 1.17   | SSPO         | 2.79   |
| TNFRSF1A | 11.05  | LOC100507156 | 2.69   | ARHGEF40    | 0.99   | XYLT1        | 2.74   |
| HMCN2    | 2.05   | CAVIN2       | 4.65   | CXCL16      | 4.90   | APLP2        | 0.77   |
| APOBEC3C | 3.27   | HAS2         | 6.02   | SPATA20     | 1.04   | CBR3         | 1.69   |
| COL3A1   | 8.26   | TGFB1I1      | 1.04   | TBX2        | 0.91   | ABCA7        | 0.85   |
| MGP      | 6.99   | CDC42EP1     | 2.48   | IGFBP2      | 1.21   | PDLIM7       | 1.00   |
| RGS11    | 1.70   | PSMB10       | 2.44   | IL11RA      | 1.40   | MEST         | 4.65   |
| CFLAR    | 1.38   | OBP2A        | 5.69   | NFKBIE      | 1.27   | EDN3         | 5.11   |
| RHBDF1   | 4.25   | TRIL         | 1.74   | LRP1B       | 5.68   | ZBTB46       | 1.51   |
| KCNG1    | 1.90   | DDR1         | 1.48   | PDE4A       | 1.27   | BTG2         | 0.57   |
| SEL1L3   | 6.30   | SSH3         | 1.33   | RBPM52      | 0.72   | TCTN3        | 0.50   |
| S100A11  | 6.39   | CRACR2B      | 1.93   | AVIL        | 2.59   | ABLIM3       | 1.62   |
| CSF1     | 1.95   | CLU          | 4.18   | BHLHE40     | 5.44   | TESK1        | 0.76   |
| CCDC80   | 7.90   | VCAN         | 5.01   | HSD3B7      | 2.55   | TNFRSF9      | 3.24   |
| CD9      | 3.13   | TNS2         | 1.97   | TPBG        | 2.67   | PXDC1        | 2.20   |
| TIMP1    | 7.39   | S100A10      | 7.90   | ZNF425      | 0.73   | LRP10        | 1.27   |
| PTGS1    | 6.25   | NT5E         | 4.88   | MCAM        | 1.92   | SERTAD1      | 1.10   |
| RBPM5    | 6.08   | RDH10        | 2.62   | KIAA0040    | 1.38   | SLC26A11     | 0.82   |
| LTBP2    | 1.56   | GNG11        | 1.04   | FOXI3       | 3.60   | FMN1         | 2.87   |
| EVA1A    | 7.27   | MTUS2        | 5.11   | C1QTNF1-AS1 | 1.16   | FSTL1        | 2.17   |
| S100A16  | 7.04   | LAT2         | 3.32   | PGGHG       | 1.12   | FAM46C       | 3.27   |
| GNG3     | 2.71   | ST6GAL1      | 2.61   | ORMDL2      | 0.85   | POP5         | 0.64   |
| TRIM17   | 1.53   | HLX          | 2.95   | KRT17       | 4.14   | NUAK1        | 3.11   |
| GLIS2    | 1.32   | LUM          | 4.89   | CERCAM      | 1.17   | ZDHHC1       | 0.84   |
| MAB21L2  | 9.87   | PEAR1        | 0.78   | POLD4       | 1.71   | IRF2BPL      | 0.84   |
| MR1      | 5.41   | S1PR3        | 1.65   | PLK2        | 2.05   | SEMA3B       | 1.63   |
| ARHGAP36 | 3.04   | GPX3         | 1.59   | ANTXR1      | 2.22   | RAB3IL1      | 0.96   |
| TUBB6    | 1.31   | RBM47        | 6.48   | VIM         | 1.83   | BMP1         | 1.13   |
| A2M      | 9.55   | NQO1         | 1.89   | ZC3H12A     | 1.50   | NOTCH4       | 1.41   |
| PHLDA3   | 1.23   | ARSA         | 1.29   | RBM24       | 4.66   | LOC101927752 | 1.11   |
| SYT9     | 4.48   | SPSB2        | 1.29   | PANX2       | 1.75   | STAC         | 1.11   |
| INSRR    | 0.79   | PTN          | 3.99   | SERPINE1    | 3.14   | COCH         | 1.22   |
| HGF      | 10.53  | TMEM254      | 0.86   | HECW1       | 2.42   | CRLF1        | 3.75   |
| ABCC3    | 6.27   | CCL2         | 4.38   | CDH2        | 2.33   | METTL7A      | 0.78   |
| MOCOS    | 3.48   | ITPKB        | 2.24   | AAED1       | 1.72   | TMEM150C     | 2.10   |
| C7       | 2.90   | TP53I13      | 1.31   | ANXA7       | 0.73   | TMEM253      | 1.84   |
| LCAT     | 1.19   | GPNMB        | 4.78   | EPS8L2      | 1.48   | SIRPA        | 2.87   |
| ITGA5    | 5.60   | ID4          | 3.92   | SERPINB8    | 2.17   | CYTH3        | 0.49   |
| IDUA     | 1.64   | KIRREL       | 8.84   | SAMD14      | 1.06   | ATXN1        | 2.37   |
| PRR16    | 1.84   | TRIM5        | 5.31   | CYSTM1      | 2.26   | GJC2         | 1.61   |
| HS3ST3B1 | 6.17   | KLHL36       | 1.20   | PPCS        | 0.49   | TMED1        | 0.81   |
| OSGIN1   | 1.67   | SDC4         | 2.74   | SLC7A4      | 2.57   | SLC39A11     | 0.51   |

|            |      |          |      |          |      |            |      |
|------------|------|----------|------|----------|------|------------|------|
| NACC2      | 1.42 | ABI3BP   | 5.64 | RAB26    | 1.28 | RTL5       | 0.99 |
| CELSR1     | 5.30 | ITM2A    | 4.28 | PLEKHG5  | 0.76 | FOXD1      | 2.76 |
| GPRC5C     | 3.49 | KCNH2    | 0.84 | FAM110B  | 0.74 | LRRC29     | 1.27 |
| KCNMB4     | 1.25 | CORIN    | 7.09 | CHRNA9   | 4.51 | WIPI1      | 1.22 |
| CAVIN1     | 5.39 | GALNT6   | 2.81 | RUSC1    | 0.72 | ADAMTS2    | 2.13 |
| CHRD       | 5.54 | THSD4    | 2.39 | ROM1     | 0.78 | FBLIM1     | 1.58 |
| LOXL2      | 3.68 | IER5L    | 1.47 | FEZ1     | 0.92 | SIK2       | 1.73 |
| ERVMER34-1 | 3.40 | LDLRAP1  | 1.47 | KIF26A   | 1.00 | ZNF467     | 2.73 |
| TRIOBP     | 1.19 | PLEKHA4  | 1.34 | NPC2     | 1.71 | PTCH2      | 1.38 |
| MSX2       | 1.10 | ACADS    | 1.12 | METRNL   | 1.77 | NRBP2      | 0.59 |
| NOTCH1     | 1.59 | DHRS1    | 0.91 | AGRN     | 1.20 | MYO15B     | 1.06 |
| SPHK1      | 4.05 | APIG2    | 0.67 | HYI      | 1.14 | CXCL12     | 3.16 |
| GBP2       | 6.29 | SP5      | 6.48 | SMIM3    | 3.00 | CMTM3      | 1.20 |
| LAMB3      | 4.06 | HEG1     | 3.46 | FN1      | 2.99 | SLC27A3    | 1.07 |
| APLNR      | 2.94 | CPVL     | 1.43 | C1orf204 | 2.44 | ARSB       | 0.82 |
| FAM129A    | 3.95 | COL1A2   | 2.84 | BOK      | 1.29 | LINC00890  | 7.03 |
| MMP15      | 2.44 | GAD1     | 4.94 | SIX1     | 6.68 | HES1       | 1.39 |
| TFEB       | 2.32 | ARSD     | 1.46 | SPOCK2   | 2.08 | PPM1M      | 0.73 |
| IL13RA1    | 5.07 | ORAI3    | 1.69 | FAM124A  | 1.32 | HBEGF      | 2.73 |
| SLC12A4    | 1.35 | ARID3A   | 0.63 | IGF2BP2  | 8.80 | COL4A1     | 1.16 |
| FBXL7      | 0.60 | ITGA6    | 4.65 | NRIP2    | 3.93 | PPL        | 1.31 |
| TGFBI      | 6.17 | NRP1     | 4.96 | CARNS1   | 3.78 | PCOLCE     | 1.01 |
| VTN        | 4.11 | FOXC1    | 2.15 | EYA4     | 3.23 | C12orf75   | 1.42 |
| PGF        | 2.43 | SHROOM1  | 1.40 | IL10RB   | 1.10 | CHGB       | 1.34 |
| VWA5B2     | 3.59 | ACPP     | 6.17 | DNALI1   | 0.60 | POPDC2     | 1.29 |
| SP110      | 4.59 | ARSJ     | 4.43 | HEXIM1   | 0.72 | GPRC5A     | 3.64 |
| FGFRL1     | 5.65 | COL27A1  | 2.11 | TGFBR2   | 2.89 | ANXA4      | 0.74 |
| ACHE       | 1.92 | CA12     | 5.72 | BOC      | 0.74 | NFKB2      | 1.13 |
| JDP2       | 1.88 | ACADVL   | 1.17 | SNTB1    | 7.16 | MAP3K12    | 0.51 |
| IGSF11     | 4.11 | NTNG2    | 1.37 | SIX2     | 4.04 | SLC27A1    | 0.92 |
| LGALS3     | 1.36 | IFITM2   | 5.59 | FGFR2    | 2.79 | HS3ST5     | 3.81 |
| SPRN       | 4.16 | SERPINF1 | 2.90 | C1QTNF1  | 2.14 | WHRN       | 1.47 |
| LHFP       | 2.96 | SIX5     | 2.27 | FAM114A1 | 1.54 | ZNF582-AS1 | 1.37 |
| TGM2       | 2.51 | NTNG1    | 3.74 | ENDOD1   | 1.20 | GNAI2      | 1.12 |
| ASL        | 1.33 | TGFB3    | 4.20 | CTDSPL   | 1.10 | NPY        | 1.04 |
| LAYN       | 3.12 | CRYM     | 4.02 | TRADD    | 1.02 | SLIT2      | 2.86 |
| HSPB7      | 3.51 | RRAS     | 2.37 | PDGFRL   | 2.76 | DUSP3      | 0.86 |
| NEDD9      | 4.45 | MB21D2   | 3.10 | GALNT2   | 0.67 | LMF2       | 0.88 |
| MST1       | 1.09 | TMBIM1   | 3.99 | BDKRB2   | 1.96 | NCK2       | 0.45 |
| HTRA1      | 5.98 | HTR4     | 7.33 | MYO3B    | 4.59 | MCHR1      | 3.23 |
| SH2D2A     | 5.79 | TAPBP    | 1.30 | CDH11    | 1.80 | FNDC5      | 2.27 |
| PTGER2     | 5.63 | CTSS     | 4.36 | IFT43    | 0.89 | CST3       | 1.06 |
| MAP3K6     | 1.26 | RAMP1    | 1.22 | LRPAP1   | 0.73 | TSPAN9     | 0.78 |
| TNFRSF12A  | 4.22 | COL6A2   | 1.79 | IAH1     | 0.69 | GNB5       | 0.41 |
| PTPN14     | 3.56 | PGAP3    | 0.96 | S100A2   | 2.09 | UBA7       | 2.28 |
| PAQR6      | 0.97 | PPIC     | 2.63 | EFEMP2   | 1.79 | ZFP36      | 1.81 |
| SLC6A9     | 2.24 | TPST1    | 1.15 | HLA-C    | 2.16 | RBM3       | 0.44 |
| PLA2G4C    | 3.06 | LRRC4C   | 5.91 | PLXDC2   | 5.96 | GBP3       | 4.67 |
| NOL3       | 1.08 | GLIPR2   | 1.19 | SRPX     | 2.62 | SNX21      | 0.57 |
| SPON2      | 3.88 | FECH     | 0.45 | SLC9A1   | 1.38 | HPCA       | 1.66 |
| LTBP1      | 3.18 | CASP4    | 4.53 | ACCS     | 0.59 | LRP1       | 1.00 |

|              |      |           |      |              |      |           |      |
|--------------|------|-----------|------|--------------|------|-----------|------|
| ATP8A2       | 6.49 | SDK2      | 2.94 | SVIL         | 2.37 | CHPF2     | 0.72 |
| SLC16A4      | 5.40 | PLAU      | 3.08 | KIAA1217     | 2.06 | RNH1      | 0.93 |
| KCNAB1       | 5.26 | MIR100HG  | 5.42 | MTCL1        | 0.95 | CD59      | 1.69 |
| CORO2B       | 3.38 | OSBPL5    | 2.68 | DHRS12       | 0.67 | SHISA4    | 1.16 |
| PIEZO1       | 3.24 | SLC22A18  | 1.61 | AFAP1L1      | 1.70 | KCNJ2     | 3.81 |
| KIF1C        | 2.03 | CYBA      | 1.16 | SHISA5       | 1.81 | TLR2      | 2.98 |
| INPP1        | 0.80 | GADD45A   | 0.59 | ELMO1        | 1.06 | CD274     | 3.08 |
| RGS3         | 2.54 | LMNA      | 0.93 | RAB7A        | 0.31 | EVC       | 1.05 |
| RNASET2      | 1.04 | SCUBE2    | 2.86 | COL6A3       | 2.51 | CEP170B   | 0.90 |
| PLAT         | 3.14 | RELN      | 4.74 | MARCH2       | 0.84 | CHST14    | 0.69 |
| COL7A1       | 2.37 | PTPN3     | 3.75 | RABEP2       | 0.84 | HGSNAT    | 0.80 |
| C10orf10     | 6.27 | ARPIN     | 0.99 | TIRAP        | 0.59 | FZD7      | 2.12 |
| PLPP4        | 5.73 | COL13A1   | 6.17 | SELENOM      | 1.15 | MYO1D     | 1.41 |
| AGT          | 5.19 | C1QTNF2   | 2.27 | CYBRD1       | 2.96 | CNTNAP1   | 1.07 |
| IGFBP3       | 4.25 | IL4R      | 5.70 | IGSF1        | 1.13 | TPM2      | 1.25 |
| MELTF        | 1.12 | SLC31A2   | 2.09 | RAB38        | 2.34 | HOMER3    | 1.07 |
| EHBP1L1      | 1.80 | TAP1      | 3.16 | VPS9D1       | 1.01 | LOC339803 | 0.59 |
| SYT12        | 7.06 | PRSS23    | 3.16 | SFXN5        | 0.73 | SFRP1     | 1.65 |
| CYTOR        | 7.48 | SIPA1     | 0.93 | TRABD2B      | 5.52 | GDF15     | 1.39 |
| TFPI2        | 2.36 | IL32      | 3.61 | ADORA2A      | 2.14 | BOLA3     | 0.64 |
| TNC          | 5.01 | ZNF185    | 2.03 | BAALC        | 2.28 | GAP43     | 1.98 |
| NLRC5        | 3.23 | PAPPA     | 6.17 | B4GALT1      | 1.57 | ARHGAP6   | 2.71 |
| ANXA2        | 2.03 | FAM19A5   | 3.34 | DKK1         | 1.25 | DYNC1I1   | 3.00 |
| ADAMTS15     | 4.93 | SYTL4     | 2.99 | MARVELD1     | 0.81 | AHNAK     | 2.52 |
| SYK          | 1.39 | EDN1      | 4.66 | GBX2         | 6.09 | FAM131B   | 4.24 |
| SOX9         | 4.19 | SYNGR3    | 1.10 | C6orf1       | 0.81 | IFI6      | 1.03 |
| COL5A1       | 4.66 | DGKQ      | 1.15 | IL33         | 5.88 | TGFB1     | 2.76 |
| GPC3         | 5.16 | DEPTOR    | 4.82 | TMEFF2       | 1.82 | IL11      | 1.75 |
| FAM89A       | 5.33 | GLI1      | 4.44 | PDLIM1       | 1.75 | RARB      | 2.70 |
| LOC101927809 | 3.62 | EPDR1     | 0.73 | FBXL8        | 1.16 | CMKLR1    | 3.78 |
| GJA1         | 8.42 | TRAF1     | 3.60 | TMEM8A       | 0.89 | ZYX       | 1.22 |
| OLFML3       | 4.44 | ASTN1     | 0.66 | OSMR         | 6.51 | SIAE      | 1.13 |
| DRAM1        | 2.79 | EPS8L1    | 1.20 | FBN1         | 2.85 | RPN2      | 0.53 |
| MMP11        | 1.97 | FSTL3     | 2.82 | SLC39A13     | 0.76 | LOC645166 | 1.28 |
| METRN        | 1.60 | FKRP      | 0.59 | STARD8       | 1.71 | KLF2      | 2.54 |
| SCN4B        | 1.30 | DGKA      | 1.22 | LOC101927204 | 3.44 | SPARCL1   | 6.88 |
| EWSAT1       | 4.66 | KIAA1211L | 2.37 | SPOCD1       | 4.23 | NTAN1     | 0.64 |
| SGPP2        | 3.40 | TBX18     | 6.79 | DEGS1        | 0.58 | ANO10     | 0.51 |
| SH3TC1       | 1.70 | PID1      | 3.47 | PNPLA3       | 4.00 | HHAT      | 0.75 |
| ZFYVE21      | 0.80 | B3GNT9    | 1.06 | ISYNA1       | 0.96 | CREB3L2   | 1.28 |
| MIR4435-2HG  | 5.83 | TNFRSF19  | 1.60 | IFITM3       | 4.94 | C19orf66  | 1.17 |
| ANGPTL4      | 5.80 | GPR37     | 3.22 | PLTP         | 0.86 | PLXNB1    | 0.48 |
| SH3RF3       | 2.56 | PTHLH     | 4.93 | KDEL3        | 2.27 | SCN9A     | 3.17 |
| CD82         | 1.91 | DNAJC22   | 2.70 | CASP8        | 4.29 | SPATA2L   | 1.12 |
| DKK2         | 4.40 | CD151     | 1.45 | CEL          | 1.40 | ATG16L2   | 0.73 |
| NTRK1        | 1.27 | GAL3ST1   | 1.48 | NOTCH3       | 1.28 | NUAK2     | 2.39 |
| ECM1         | 5.15 | LOXL4     | 1.15 | SPRY4        | 1.16 | SPEG      | 0.66 |
| B3GNT4       | 2.91 | PMP22     | 0.93 | COLEC11      | 0.80 | CEMIP     | 5.15 |
| SERPINE2     | 7.09 | SVEP1     | 4.68 | PHYKPL       | 0.50 | GFRA1     | 3.04 |
| TXNDC11      | 0.65 | LSR       | 1.98 | MUM1         | 0.48 | UXS1      | 1.07 |
| TCF7L1       | 2.16 | DOCK2     | 4.75 | RAB20        | 1.93 | DNASE1L2  | 1.75 |

|           |      |             |      |              |      |              |      |
|-----------|------|-------------|------|--------------|------|--------------|------|
| PPP1R13B  | 1.32 | PXDN        | 0.95 | AJUBA        | 1.25 | B3GAT3       | 0.81 |
| CLCF1     | 5.16 | DUSP10      | 2.50 | CPXM1        | 1.04 | POLR2L       | 0.90 |
| TRIM21    | 2.73 | MRC2        | 2.35 | NPAS3        | 4.29 | MAN2B2       | 0.66 |
| YAP1      | 5.61 | DUSP6       | 1.02 | KREMEN1      | 1.21 | CTTN         | 0.31 |
| KRT18     | 5.21 | ABTB1       | 1.03 | BDKRB1       | 2.90 | SORBS3       | 0.74 |
| GABARAPL1 | 1.91 | ABHD15      | 1.19 | LGALS1       | 1.15 | BATF3        | 2.42 |
| GRIN2C    | 4.75 | TRPM4       | 1.26 | LTBP3        | 0.93 | SEMA3D       | 4.22 |
| RHOC      | 1.79 | EPN3        | 4.24 | LOC100506258 | 3.75 | B4GALNT3     | 0.94 |
| LRP4      | 1.91 | MAN1A1      | 3.33 | TRIB2        | 1.95 | ADAM19       | 1.85 |
| EVA1B     | 2.66 | TMEM108-AS1 | 3.36 | SGSH         | 0.80 | EFHD1        | 1.77 |
| ICAM1     | 4.82 | SCARF2      | 1.30 | IL17RA       | 2.84 | AK5          | 1.40 |
| TAGLN     | 1.82 | PTPRR       | 2.22 | FAM120AOS    | 0.48 | FMNL1        | 1.19 |
| PLPPR3    | 1.26 | MIPEP       | 0.69 | PTGR1        | 2.65 | ALKAL2       | 3.24 |
| SSC5D     | 4.72 | MVP         | 2.02 | ITGA7        | 2.23 | MSRB3        | 2.38 |
| ADAMTSL4  | 3.43 | CORO2A      | 2.43 | VIPR2        | 2.17 | SH2B3        | 0.86 |
| PTPRB     | 2.84 | OLFML2A     | 1.95 | TMSB4X       | 1.66 | GFRA2        | 2.31 |
| RET       | 0.49 | ITGA3       | 2.65 | SUMF1        | 0.81 | CYB5R2       | 4.47 |
| PTPRE     | 4.26 | CPNE2       | 1.00 | XYLT2        | 0.76 | TMEM59L      | 0.81 |
| THBS2     | 9.60 | PQLC3       | 1.46 | TMEM100      | 3.47 | DSTNP2       | 0.94 |
| AQP3      | 3.09 | RPS6KA4     | 0.88 | COL11A2      | 1.94 | BRINP1       | 2.33 |
| FAM20C    | 6.85 | C1QTNF6     | 1.51 | ITPR3        | 1.45 | SPON1        | 4.72 |
| BCL3      | 2.89 | SHISA2      | 5.42 | CDC42BPG     | 2.45 | LOC101926941 | 0.91 |
| RENBP     | 1.88 | MPP4        | 5.47 | SRD5A3       | 0.47 | ID1          | 0.82 |
| ALS2CL    | 1.85 | GPC4        | 4.09 | HSPB8        | 3.13 | SH3BGRL3     | 0.92 |
| ECEL1     | 3.02 | LPAR1       | 3.99 | LTK          | 1.73 | CRELD1       | 0.78 |
| PHLDA1    | 3.70 | NME3        | 1.43 | FLI1         | 5.30 | PSMB8        | 3.05 |
| FAM111A   | 4.50 | PBXIP1      | 2.07 | LHX9         | 4.59 | ADAMTS7      | 0.84 |
| ACTA2     | 1.68 | WTIP        | 3.04 | TSPAN8       | 2.52 | RBCK1        | 0.64 |
| TPM1      | 1.89 | SSBP2       | 2.20 | SMAGP        | 2.37 | IRF6         | 1.68 |
| IL13RA2   | 4.48 | CHST1       | 2.05 | FAM196B      | 5.05 | DRAXIN       | 1.28 |
| MOV10L1   | 3.23 | EMILIN1     | 1.28 | SPRY1        | 1.64 | NOD2         | 1.93 |
| TMEM150A  | 1.15 | CPT1A       | 0.76 | ASIC3        | 0.87 | CAPS         | 0.73 |
| SPARC     | 2.82 | C1R         | 2.74 | TTLL3        | 0.81 |              |      |

626

627

628 **Supplementary Table II. ChIP datasets identified with 723 upregulated transcripts in human**  
 629 **Tau-KO cells (Adj P<.01). Analysis performed August 4<sup>th</sup> 2022.**

| ChEA_2016 Term                                  | Adj P    | Comment                                       |
|-------------------------------------------------|----------|-----------------------------------------------|
| SUZ12 20075857 ChIP-Seq MESC's Mouse            | 1.22E-31 | PRC2 core                                     |
| MTF2 20144788 ChIP-Seq MESC's Mouse             | 3.73E-21 | PRC2.1 facultative subunit                    |
| ELK3 25401928 ChIP-Seq HUVEC Human              | 1.83E-17 | TX factor                                     |
| RELA 24523406 ChIP-Seq FIBROSARCOMA Human       | 1.27E-12 | TX factor - NFKB subunit - EZH2 interactor    |
| SUZ12 18974828 ChIP-Seq MESC's Mouse            | 1.89E-12 | PRC2 core                                     |
| TCF21 26020271 ChIP-Seq SMOOTH MUSCLE Human     | 1.90E-12 | TX factor - basic helix-loop-helix            |
| RACK7 27058665 Chip-Seq MCF-7 Human             | 1.78E-11 | TX regulator - RACK receptor - PRC2 regulator |
| SUZ12 27294783 Chip-Seq ESCs Mouse              | 3.39E-11 | PRC2 core                                     |
| EGR1 20690147 ChIP-Seq ERYTHROLEUKEMIA Human    | 4.40E-11 | TX regulator - C2H2 zink finger               |
| SUZ12 18692474 ChIP-Seq MEFs Mouse              | 9.20E-11 | PRC2 core                                     |
| KDM2B 26808549 Chip-Seq K562 Human              | 2.20E-10 | PRC1 core                                     |
| EZH2 27294783 Chip-Seq ESCs Mouse               | 2.20E-10 | PRC2 core                                     |
| JARID2 20075857 ChIP-Seq MESC's Mouse           | 6.20E-10 | PRC2.2 facultative subunit                    |
| RNF2 18974828 ChIP-Seq MESC's Mouse             | 6.31E-10 | PRC1 core                                     |
| EZH2 18974828 ChIP-Seq MESC's Mouse             | 6.31E-10 | PRC2 core                                     |
| WT1 20215353 ChIP-ChIP NEPHRON PROGENITOR Mouse | 6.31E-10 | TX factor                                     |
| RING1B 27294783 Chip-Seq ESCs Mouse             | 6.75E-10 | PRC1 core                                     |
| SUZ12 18692474 ChIP-Seq MESC's Mouse            | 1.05E-09 | PRC2 core                                     |
| SUZ12 18555785 ChIP-Seq MESC's Mouse            | 4.07E-09 | PRC2 core                                     |
| KDM2B 26808549 Chip-Seq SUP-B15 Human           | 4.83E-09 | PRC1 core                                     |
| SRY 25088423 ChIP-ChIP EMBRYONIC GONADS Mouse   | 7.06E-09 | TX factor - SRY-Box                           |
| KLF4 26769127 Chip-Seq PDAC-Cell line Human     | 3.39E-08 | TX - Kruppel                                  |
| RNF2 27304074 Chip-Seq ESCs Mouse               | 5.77E-08 | PRC1 core                                     |
| WT1 25993318 ChIP-Seq PODOCYTE Human            | 7.32E-08 | TX factor                                     |
| JARID2 20064375 ChIP-Seq MESC's Mouse           | 9.08E-08 | PRC2.2 facultative subunit                    |
| SOX2 20726797 ChIP-Seq SW620 Human              | 1.31E-07 | TX factor - SRY-Box                           |
| RARG 19884340 ChIP-ChIP MEFs Mouse              | 2.46E-07 | TX factor - ligand activated                  |
| UBF1/2 26484160 Chip-Seq HMEC-DERIVED Human     | 3.52E-07 | TX factor - RNA transcription                 |
| RUNX2 24764292 ChIP-Seq MC3T3 Mouse             | 6.32E-07 | TX factor                                     |
| TP53 20018659 ChIP-ChIP R1E Mouse               | 9.40E-07 | TX factor - P53 family                        |
| SMC1 22415368 ChIP-Seq MEFs Mouse               | 1.09E-06 | cohesin subunit - PRC1 regulator              |
| ZNF217 24962896 ChIP-Seq MCF-7 Human            | 2.05E-06 | TX factor - repressor - PRC2 regulator        |
| SA1 22415368 ChIP-Seq MEFs Mouse                | 3.08E-06 | cohesin subunit                               |
| KDM2B 26808549 Chip-Seq JURKAT Human            | 3.08E-06 | PRC1 core                                     |
| RING1B 27294783 Chip-Seq NPCs Mouse             | 3.08E-06 | PRC1 core                                     |
| KLF5 25053715 ChIP-Seq YYC3 Human               | 3.08E-06 | TX - Kruppel                                  |
| ESR2 21235772 ChIP-Seq MCF-7 Human              | 4.87E-06 | TX factor - hormone activated                 |
| KDM2B 26808549 Chip-Seq DND41 Human             | 9.18E-06 | PRC1 core                                     |
| EOMES 21245162 ChIP-Seq HESCs Human             | 1.05E-05 | TX factor - T-box                             |
| P300 27058665 Chip-Seq ZR-75-30cells Human      | 1.49E-05 | HAT                                           |
| JUN 26020271 ChIP-Seq SMOOTH MUSCLE Human       | 1.49E-05 | TX factor - proto-oncogene                    |
| KLF6 26769127 Chip-Seq PDAC-Cell line Human     | 2.39E-05 | TX - Kruppel                                  |
| CJUN 26792858 Chip-Seq BT549 Human              | 2.39E-05 | TX factor - proto-oncogene                    |
| CTCF 27219007 Chip-Seq ERYTHROID Human          | 2.39E-05 | TX regulator - zink finger - PRC2 regulator   |
| ATF3 23680149 ChIP-Seq GBM1-GSC Human           | 2.70E-05 | TX factor - CREB                              |

|                                             |          |                                             |
|---------------------------------------------|----------|---------------------------------------------|
| BACH1 22875853 ChIP-PCR HELA AND SCP4 Human | 3.63E-05 | TX factor - CNC-bZip - PRC2 regulator       |
| KDM2B 26808549 Chip-Seq SIL-ALL Human       | 6.35E-05 | PRC1 core                                   |
| ZFP281 27345836 Chip-Seq ESCs Mouse         | 6.35E-05 | TX factor - repressor - PRC2 regulator      |
| CEBPD 21427703 ChIP-Seq 3T3-L1 Mouse        | 7.41E-05 | TX factor - bZIP                            |
| P63 26484246 Chip-Seq KERATINOCYTES Human   | 0.00010  | TX factor - P53 family                      |
| TP63 17297297 ChIP-ChIP HaCaT Human         | 0.00013  | TX factor - P53 family                      |
| EED 16625203 ChIP-ChIP MESC's Mouse         | 0.00014  | PRC2 core                                   |
| NFI 21473784 ChIP-Seq ESCs Mouse            | 0.00016  | TX factor - CTF/NF-I family                 |
| EZH2 27304074 Chip-Seq ESCs Mouse           | 0.00021  | PRC2 core                                   |
| ELF3 26769127 Chip-Seq PDAC-Cell line Human | 0.00025  | TX factor                                   |
| LXR 22292898 ChIP-Seq THP-1 Human           | 0.00025  | TX factor - ligand activated                |
| ESR1 21235772 ChIP-Seq MCF-7 Human          | 0.00033  | TX factor - hormone activated               |
| BRD4 25478319 ChIP-Seq HGPS Human           | 0.00037  | TX factor - bromodomain                     |
| SMC3 22415368 ChIP-Seq MEFs Mouse           | 0.00037  | cohesin subunit - PRC1 regulator            |
| CLOCK 20551151 ChIP-Seq 293T Human          | 0.00037  | TX factor - regulation of circadian rhythms |
| CTCF 27219007 Chip-Seq Bcells Human         | 0.00037  | TX regulator - zink finger - PRC2 regulator |
| SUZ12 16625203 ChIP-ChIP MESC's Mouse       | 0.00057  | PRC2 core                                   |
| CREB1 26743006 Chip-Seq LNCaP-abl Human     | 0.00057  | TX factor - CREB                            |
| CTCF 21964334 Chip-Seq Bcells Human         | 0.00057  | TX regulator - zink finger - PRC2 regulator |
| TP53 23651856 ChIP-Seq MEFs Mouse           | 0.00071  | TX factor - P53 family                      |
| KLF4 18358816 ChIP-ChIP MESC's Mouse        | 0.00091  | TX - Kruppel                                |
| SOX9 24532713 ChIP-Seq HFSC Mouse           | 0.00097  | TX factor - SRY-Box                         |
| NUCKS1 24931609 ChIP-Seq HEPATOCYTES Mouse  | 0.00097  | TX regulator - dna repair                   |

630



631 **Supplementary Table III. Epigenomic datasets identified with 723 upregulated transcripts in**  
 632 **human Tau-KO cells (Adj P<.01). Analysis performed August 4<sup>th</sup> 2022.**

| Epigenomics Roadmap HM ChIP Term                    | Adj P   | Comment   |
|-----------------------------------------------------|---------|-----------|
| H3K27me3 H1                                         | 6.4E-23 | H3K27me3  |
| H3K27me3 Colonic Mucosa                             | 1.2E-18 | H3K27me3  |
| H3K27me3 Mobilized CD34 Primary Cells               | 2.9E-16 | H3K27me3  |
| H3K27me3 Fetal Brain                                | 1.8E-15 | H3K27me3  |
| H3K27me3 iPS-20b                                    | 1.2E-11 | H3K27me3  |
| H3K27me3 iPS DF 19.11                               | 7.3E-11 | H3K27me3  |
| H3K27me3 CD34 Primary Cells                         | 3.1E-10 | H3K27me3  |
| H3K27me3 H9                                         | 4.2E-10 | H3K27me3  |
| H3K27me3 CD8 Memory Primary Cells                   | 3.1E-09 | H3K27me3  |
| H3K27me3 iPS DF 6.9                                 | 1.4E-08 | H3K27me3  |
| H3K27me3 CD4+ CD25- CD45RA+ Naive Primary Cells     | 2.2E-08 | H3K27me3  |
| H3K27me3 CD8 Naive Primary Cells                    | 3.2E-08 | H3K27me3  |
| H3K27me3 Rectal Smooth Muscle                       | 4.0E-08 | H3K27me3  |
| H3K27me3 H1 BMP4 Derived Mesendoderm Cultured Cells | 9.7E-08 | H3K27me3  |
| H2BK20ac IMR90                                      | 1.7E-07 | H2BK20ac  |
| H3K27me3 CD4+ CD25int CD127+ Tmem Primary Cells     | 2.6E-07 | H3K27me3  |
| H3K27me3 Duodenum Mucosa                            | 3.1E-07 | H3K27me3  |
| H3K27me3 iPS-15b                                    | 1.3E-06 | H3K27me3  |
| H3K27me3 H1 BMP4 Derived Trophoblast Cultured Cells | 1.9E-06 | H3K27me3  |
| H3K4me1 CD4+ CD25- CD45RA+ Naive Primary Cells      | 9.5E-06 | H3K4me1   |
| H3K27me3 Rectal Mucosa                              | 1.6E-05 | H3K27me3  |
| H3K4me1 H1                                          | 3.2E-05 | H3K4me1   |
| H3K4me1 Brain Germinal Matrix                       | 3.4E-05 | H3K4me1   |
| H2BK20ac H1                                         | 3.5E-05 | H2BK20ac  |
| H3K27me3 Brain Germinal Matrix                      | 4.6E-05 | H3K27me3  |
| H3K4me1 IMR90                                       | 5.8E-05 | H3K4me1   |
| H3K27me3 CD4+ CD25- CD45RO+ Memory Primary Cells    | 1.4E-04 | H3K27me3  |
| H3K27me3 Pancreatic Islets                          | 1.9E-04 | H3K27me3  |
| H3K27me3 CD3 Primary Cells                          | 2.4E-04 | H3K27me3  |
| H3K27me3 Neurosphere Cultured Cells Cortex Derived  | 2.5E-04 | H3K27me3  |
| H2BK12ac IMR90                                      | 2.7E-04 | H2BK12ac  |
| H3K4me1 CD4+ CD25- Th Primary Cells                 | 2.7E-04 | H3K4me1   |
| H3K4me1 Fetal Brain                                 | 2.8E-04 | H3K4me1   |
| H3K27me3 CD4 Naive Primary Cells                    | 3.2E-04 | H3K27me3  |
| H3K27me3 Stomach Mucosa                             | 4.3E-04 | H3K27me3  |
| H3K27me3 CD4+ CD25+ CD127- Treg Primary Cells       | 5.2E-04 | H3K27me3  |
| H3K27me3 Fetal Lung                                 | 7.6E-04 | H3K27me3  |
| H3K27me3 CD4+ CD25- Th Primary Cells                | 8.1E-04 | H3K27me3  |
| H3K27me3 Duodenum Smooth Muscle                     | 0.0011  | H3K27me3  |
| H2BK15ac IMR90                                      | 0.0018  | H2BK15ac  |
| H3K27me3 Brain Hippocampus Middle                   | 0.0021  | H3K27me3  |
| H3K27me3 CD4 Memory Primary Cells                   | 0.0028  | H3K27me3  |
| H2BK120ac IMR90                                     | 0.0031  | H2BK120ac |
| H3K27me3 Brain Substantia Nigra                     | 0.0031  | H3K27me3  |
| H3K4me1 iPS DF 6.9                                  | 6.6E-03 | H3K4me1   |

633 **Supplementary Table IV: qPCR primers**

| <b>mRNA</b> | <b>Forward primer (5'-3')</b> | <b>Reverse primer (5'-3')</b> |
|-------------|-------------------------------|-------------------------------|
| EZH2        | GACCTCTGTCTTACTTGTGGAGC       | CGTCAGATGGTGCCAGCAATAG        |
| SUZ12       | CCATGCAGGAAATGGAAGAATGTC      | CTGTCCAACGAAGAGTGAAGTGC       |
| IGFBP3      | CGCTACAAAGTTGACTACGAGTC       | GTCTTCCATTTCTCTACGGCAGG       |
| GPR37       | TTCTGCCTTCCGCTGGTCATCT        | TGAAGGTGGTGACTCCCAGAGA        |
| ITGA3       | GCCTGACAACAAGTGTGAGAGC        | GGTGTTTCGTCACGTTGATGCTC       |
| MRC2        | GGCAAGGACAAGAAGTGCGTGT        | CTTTGGTGACGTTGCTGCGCTT        |
| IRF6        | AGAGAAGCAGCCACCGTTTGAG        | GATCATCCGAGCCACTACTGGA        |

634
